# Supplementary material for: An efficient tandem elimination–cyclization–desulfitative arylation of 2-(gem-dibromovinyl)phenols(thiophenols) with sodium arylsulfinates
Source: Royal Society of Chemistry journal article supplement (doi:10.1039/c2ob27232f), 2012-11-22
Supplement: c2ob27232f.pdf [file c2ob27232f.pdf]

Supplementary Material (ESI) for Organic & Biomolecular Chemistry

This journal is (c) The Royal Society of Chemistry 2012

**A tandem elimination–cyclization–desulfitative arylation  
reaction of 2-(*gem*-dibromovinyl)phenols(thiophenols) with  
sodium arylsulfonates**

Wei Chen,<sup>†</sup> Pinhua Li,<sup>†</sup> Tao Miao,<sup>†</sup> Ling-Guo Meng,<sup>\*†</sup> and Lei Wang<sup>\*†,‡</sup>

<sup>†</sup> *Department of Chemistry, Huaibei Normal University, Huaibei, Anhui 235000, P. R. China*

<sup>‡</sup> *State Key Laboratory of Organometallic Chemistry, Shanghai Institute of Organic Chemistry*

*Shanghai 200032, P. R. China*

*[leiwang@chnu.edu.cn](mailto:leiwang@chnu.edu.cn)*

***Table of Contents for Supporting Information***

|                                                                        |    |
|------------------------------------------------------------------------|----|
| 1. General considerations.....                                         | 2  |
| 2. Typical procedure.....                                              | 2  |
| 3. Characterization data for all products.....                         | 3  |
| 4. <sup>1</sup> H and <sup>13</sup> C NMR spectra of the products..... | 11 |
| 5. References .....                                                    | 33 |

## 1. General considerations

All the tandem reactions of 2-(*gem*-dibromovinyl)phenols(thiophenols) with sodium arylsulfonates were carried out under a nitrogen atmosphere.  $^1\text{H}$  and  $^{13}\text{C}$  NMR spectra were measured on a Bruker Avance 400 MHz NMR spectrometer (400 MHz or 100 MHz, respectively) with  $\text{CDCl}_3$  as solvent and recorded in ppm relative to internal tetramethylsilane standard. High resolution mass spectroscopy data of the product were collected on a Waters Micromass GCT instrument. The solvents and general chemicals were purchased from commercial suppliers and used without further purification. All the *gem*-dibromovinyl substrates were synthesized according to the reported procedures in the literature (Newman, S. G.; Aureggi, V.; Bryan, C. S.; Lautens, M. *Chem. Commun.* **2009**, 5236–5238).

## 2. Typical procedure for the tandem elimination–cyclization –desulfitative arylation reaction

A sealable reaction tube equipped with a magnetic stirrer bar was charged with *gem*-dibromovinyl substrate (0.50 mmol), TBAF (1.0 mmol) and DMF (3.0 mL). The reaction mixture was stirred for 4 h at room temperature, then sodium arylsulfinate (1.0 mmol),  $\text{PdCl}_2$  (0.050 mmol),  $\text{Cu}(\text{OAc})_2$  (1.0 mmol),  $\text{NEt}_3$  (1.0 mmol) were added to the reaction system. The rubber septum was then replaced by a Teflon-coated screw cap, and the reaction vessel placed in an oil bath at 110 °C. After stirring the mixture at this temperature for 12 h, it was cooled to room temperature and diluted with ethyl acetate, washed with water and brine, dried over  $\text{MgSO}_4$ . After the solvent was removed under reduced pressure, the residue was purified by column chromatography on silica gel (eluant: petroleum ether) to afford the corresponding product.

### 3. Characterization data for all products

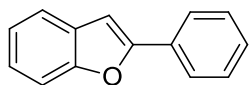

**3a:**<sup>[1]</sup> mp 120–121 °C.

<sup>1</sup>H NMR (400 MHz, CDCl<sub>3</sub>): δ = 7.90 (d, *J* = 8.0 Hz, 2H), 7.61 (d, *J* = 8.0 Hz, 1H), 7.55 (d, *J* = 8.0 Hz, 1H), 7.49–7.46 (m, 2H), 7.40–7.36 (m, 1H), 7.33–7.24 (m, 2H), 7.05 (s, 1H); <sup>13</sup>C NMR (100 MHz, CDCl<sub>3</sub>): δ = 155.9, 154.9, 130.5, 129.2, 128.8, 128.5, 124.9, 124.2, 122.9, 120.9, 111.2, 101.3.

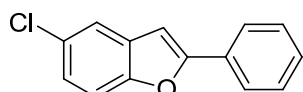

**3b:**<sup>[1]</sup> mp 155–156 °C.

<sup>1</sup>H NMR (400 MHz, CDCl<sub>3</sub>): δ = 7.83–7.81 (m, 2H), 7.51–7.50 (m, 1H), 7.45–7.33 (m, 4H), 7.22–7.19 (m, 1H), 6.91 (s, 1H); <sup>13</sup>C NMR (100 MHz, CDCl<sub>3</sub>): δ = 157.4, 153.2, 130.6, 129.9, 129.0, 128.8, 128.5, 125.0, 124.4, 120.4, 112.1, 100.8.

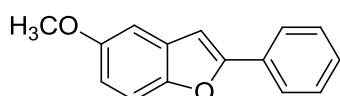

**3c:**<sup>[1]</sup> mp 131–132 °C.

<sup>1</sup>H NMR (400MHz, CDCl<sub>3</sub>): δ = 7.87 (d, *J* = 8.0 Hz, 2H), 7.48–7.42 (m, 3H), 7.37 (t, *J* = 8.0 Hz, 1H), 7.07 (d, *J* = 2.8 Hz, 1H), 6.98 (s, 1H), 6.92 (dd, *J* = 8.0, 2.8 Hz, 1H), 3.88 (s, 3H); <sup>13</sup>C NMR (100 MHz, CDCl<sub>3</sub>): δ = 156.7, 156.1, 150.0, 130.6, 129.8, 128.8, 128.5, 124.9, 113.0, 111.6, 103.3, 101.5, 55.9.

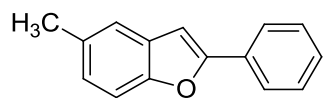

**3d:**<sup>[1]</sup> mp 129–130 °C.

<sup>1</sup>H NMR (400 MHz, CDCl<sub>3</sub>): δ = 7.88 (d, *J* = 8.0 Hz, 2H), 7.48–7.34 (m, 5H), 7.12 (d, *J* = 8.0 Hz, 1H), 6.97 (s, 1H), 2.47 (s, 3H); <sup>13</sup>C NMR (100 MHz, CDCl<sub>3</sub>): δ = 156.0, 153.3, 132.3, 130.6, 129.3, 128.8, 128.4, 125.5, 124.9, 120.7, 110.7, 101.1, 21.4.

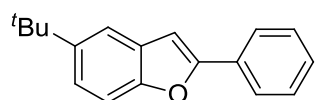

**3e:**<sup>[1]</sup> mp 103–104 °C.

<sup>1</sup>H NMR (400 MHz, CDCl<sub>3</sub>): δ = 7.93–7.91 (m, 2H), 7.65 (s, 1H), 7.52–7.48 (m, 3H), 7.43–7.39 (m, 2H), 7.05 (s, 1H), 1.46 (s, 9H); <sup>13</sup>C NMR (100 MHz, CDCl<sub>3</sub>): δ = 156.0, 153.2, 146.0, 130.7, 128.9, 128.7, 128.3, 124.8, 122.2, 117.1, 110.4, 101.5, 34.7, 31.8.

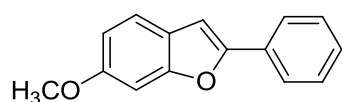

**3f:**<sup>[1]</sup> mp 78–79 °C.

<sup>1</sup>H NMR (400 MHz, CDCl<sub>3</sub>): δ = 7.84 (d, *J* = 8.0 Hz, 2H), 7.47–7.43 (m, 3H), 7.36–7.32 (m, 1H), 7.00 (d, *J* = 1.6 Hz, 1H), 6.97 (s, 1H), 6.90 (dd, *J* = 8.0, 2.4 Hz, 1H), 3.89 (s, 3H); <sup>13</sup>C NMR (100 MHz, CDCl<sub>3</sub>): δ = 158.1, 155.9, 155.1, 130.7, 128.7, 128.0, 124.4, 122.6, 121.0, 112.0, 101.1, 95.9, 55.7.

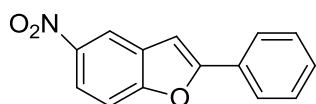

**3g:**<sup>[1]</sup> mp 151–152 °C.

<sup>1</sup>H NMR (400 MHz, CDCl<sub>3</sub>): δ = 8.51 (d, *J* = 2.4 Hz, 1H), 8.22 (dd, *J* = 8.8, 2.4 Hz, 1H), 7.90–7.88 (m, 2H), 7.60 (d, *J* = 9.2 Hz, 1H), 7.52–7.48 (m, 2H), 7.46–7.42 (m, 1H), 7.13 (s, 1H); <sup>13</sup>C NMR (100 MHz, CDCl<sub>3</sub>): δ = 159.3, 157.6, 144.3, 129.7, 129.6, 129.2, 129.0, 125.3, 120.1, 117.2, 111.4, 101.6.

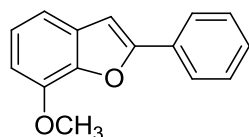

**3h:**<sup>[1]</sup> mp 78–79 °C.

<sup>1</sup>H NMR (400 MHz, CDCl<sub>3</sub>): δ = 7.94–7.92 (m, 2H), 7.49–7.45 (m, 2H), 7.39–7.36 (m, 1H), 7.23–7.16 (m, 2H), 7.04 (s, 1H), 6.84 (d, *J* = 8.0 Hz, 1H), 4.08 (s, 3H); <sup>13</sup>C NMR (100 MHz, CDCl<sub>3</sub>): δ = 156.1, 145.4, 144.2, 131.0, 130.4, 128.7, 128.6, 125.1, 123.6, 113.4, 106.7, 101.7, 56.2.

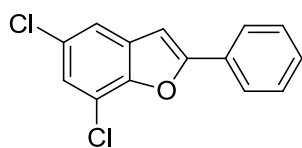

**3i:**<sup>[2]</sup> mp 128–129 °C.

<sup>1</sup>H NMR (400 MHz, CDCl<sub>3</sub>): δ = 7.89 (d, *J* = 8.0 Hz, 2H), 7.50–7.40 (m, 4H), 7.28 (d, *J* = 1.6 Hz, 1H), 6.98 (s, 1H); <sup>13</sup>C NMR (100 MHz, CDCl<sub>3</sub>): δ = 158.1, 149.2, 131.5, 129.4, 129.3, 128.9, 128.7, 125.2, 124.3, 119.0, 117.1, 101.2.

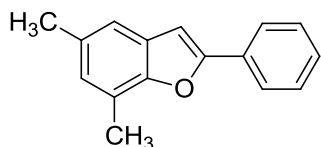

**3j:**<sup>[1]</sup> mp 60–61 °C.

<sup>1</sup>H NMR (400 MHz, CDCl<sub>3</sub>): δ = 7.85–7.83 (m, 2H), 7.43–7.39 (m, 2H), 7.33–7.29 (m, 1H), 7.16 (s, 1H), 6.90–6.88 (m, 2H), 2.52 (s, 3H), 2.39 (s, 3H); <sup>13</sup>C NMR (100 MHz, CDCl<sub>3</sub>): δ = 155.6, 152.4, 132.3, 130.8, 128.8, 128.7, 128.2, 126.6, 124.8, 120.8, 118.1, 101.3, 21.3, 15.0.

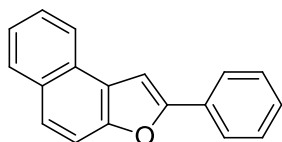

**3k:**<sup>[1]</sup> mp 142–143 °C.

<sup>1</sup>H NMR (400 MHz, CDCl<sub>3</sub>): δ = 8.20 (d, *J* = 8.0 Hz, 1H), 7.98–7.94 (m, 3H), 7.76–7.70 (m, 2H), 7.64–7.60 (m, 1H), 7.55 (s, 1H), 7.53–7.48 (m, 3H), 7.39–7.36 (m, 1H); <sup>13</sup>C NMR (100 MHz, CDCl<sub>3</sub>): δ = 155.4, 152.4, 130.7, 130.4, 128.9, 128.8, 128.3, 127.6, 126.3, 125.2, 124.7, 124.6, 124.5, 123.5, 112.3, 100.5.

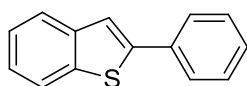

**3l:**<sup>[1]</sup> mp 174–176 °C.

<sup>1</sup>H NMR (400 MHz, CDCl<sub>3</sub>): δ = 7.87–7.85 (m, 1H), 7.81–7.79 (m, 1H), 7.76–7.74 (m, 2H), 7.58 (s, 1H), 7.47–7.44 (m, 2H), 7.40–7.32 (m, 3H); <sup>13</sup>C NMR (100 MHz, CDCl<sub>3</sub>): δ = 144.2, 140.7, 139.5, 134.3, 128.9, 128.2, 126.5, 124.5, 124.3, 123.5,

122.2, 119.4.

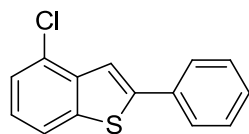

**3m:**<sup>[1]</sup> mp 111–112 °C.

<sup>1</sup>H NMR (400 MHz, CDCl<sub>3</sub>): δ = 7.77–7.71 (m, 4H), 7.48–7.45 (m, 2H), 7.41–7.37 (m, 2H), 7.27–7.23 (m, 1H); <sup>13</sup>C NMR (100 MHz, CDCl<sub>3</sub>): δ = 145.2, 140.4, 138.9, 133.7, 129.0, 128.6, 128.4, 126.5, 124.8, 124.4, 120.7, 117.6.

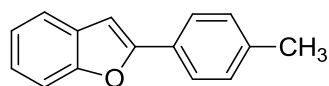

**4a:**<sup>[3]</sup> mp 126–127 °C.

<sup>1</sup>H NMR (400 MHz, CDCl<sub>3</sub>): δ = 7.79 (d, *J* = 8.0 Hz, 2H), 7.61–7.53 (m, 2H), 7.32–7.23 (m, 4H), 6.99 (s, 1H), 2.43 (s, 3H); <sup>13</sup>C NMR (100 MHz, CDCl<sub>3</sub>): δ = 156.2, 154.8, 138.6, 129.5, 129.4, 127.8, 124.9, 124.0, 122.9, 120.7, 111.1, 100.6, 21.4.

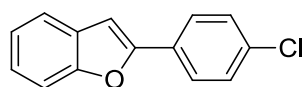

**4b:**<sup>[4]</sup> mp 148–149 °C.

<sup>1</sup>H NMR (400 MHz, CDCl<sub>3</sub>): δ = 7.80 (d, *J* = 8.0 Hz, 2H), 7.61 (d, *J* = 7.2 Hz, 1H), 7.54 (d, *J* = 8.0 Hz, 1H), 7.43 (d, *J* = 8.0 Hz, 2H), 7.35–7.25 (m, 2H), 7.01 (s, 1H); <sup>13</sup>C NMR (100 MHz, CDCl<sub>3</sub>): δ = 154.9, 154.8, 134.3, 129.1, 129.0, 129.0, 126.1, 124.6, 123.1, 121.0, 111.2, 101.8.

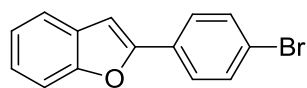

**4c:**<sup>[5]</sup> mp 148–149 °C.

<sup>1</sup>H NMR (400 MHz, CDCl<sub>3</sub>): δ = 7.74 (d, *J* = 8.0 Hz, 2H), 7.61–7.53 (m, 4H), 7.34–7.24 (m, 2H), 7.03 (s, 1H); <sup>13</sup>C NMR (100 MHz, CDCl<sub>3</sub>): δ = 154.9, 154.7, 131.9, 129.4, 129.0, 126.3, 124.6, 123.1, 122.5, 121.0, 111.2, 101.8.

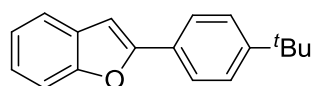

**4d:**<sup>[6]</sup> mp 128–129 °C.

<sup>1</sup>H NMR (400 MHz, CDCl<sub>3</sub>): δ = 7.85 (d, *J* = 8.0 Hz, 2H), 7.62 (d, *J* = 7.2 Hz, 1H), 7.57 (d, *J* = 8.0 Hz, 1H), 7.52 (d, *J* = 8.0 Hz, 2H), 7.34–7.25 (m, 2H), 7.02 (s, 1H), 1.41 (s, 9H); <sup>13</sup>C NMR (100 MHz, CDCl<sub>3</sub>): δ = 156.2, 154.9, 151.8, 129.4, 127.8, 125.8, 124.8, 124.0, 122.9, 120.8, 111.2, 100.7, 34.8, 31.3.

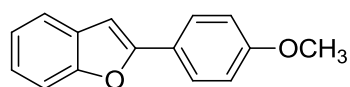

**4e:**<sup>[3]</sup> mp 149–150 °C.

<sup>1</sup>H NMR (400 MHz, CDCl<sub>3</sub>): δ = 7.82 (d, *J* = 8.8 Hz, 2H), 7.58–7.57 (m, 1H), 7.53–7.51 (m, 1H), 7.29–7.22 (m, 2H), 7.00 (d, *J* = 8.8 Hz, 2H), 6.91 (s, 1H), 3.88 (s, 3H); <sup>13</sup>C NMR (100 MHz, CDCl<sub>3</sub>): δ = 160.0, 156.1, 154.7, 129.5, 126.4, 123.7, 123.4, 122.8, 120.6, 114.3, 111.0, 99.7, 55.4.



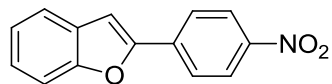

**4f:**<sup>[7]</sup> mp 183–184 °C.

<sup>1</sup>H NMR (400 MHz, CDCl<sub>3</sub>): δ = 8.31 (d, *J* = 8.4 Hz, 2H), 8.01 (d, *J* = 8.4 Hz, 2H), 7.66–7.64 (m, 1H), 7.58–7.56 (m, 1H), 7.40–7.36 (m, 1H), 7.31–7.27 (m, 1H), 7.24 (s, 1H); <sup>13</sup>C NMR (100 MHz, CDCl<sub>3</sub>): δ = 155.4, 153.2, 147.2, 136.3, 128.6, 125.8, 125.2, 124.3, 123.5, 121.6, 111.5, 105.1.

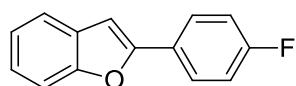

**4g:**<sup>[3]</sup> mp 119–120 °C.

<sup>1</sup>H NMR (400 MHz, CDCl<sub>3</sub>): δ = 7.87–7.84 (m, 2H), 7.61–7.60 (m, 1H), 7.56–7.54 (m, 1H), 7.34–7.27 (m, 2H), 7.19–7.14 (m, 2H), 6.97 (s, 1H); <sup>13</sup>C NMR (100 MHz, CDCl<sub>3</sub>): δ = 162.8 (d, *J* = 247.2 Hz), 155.0, 154.8, 129.1, 126.7 (d, *J* = 8.1 Hz), 124.3, 123.0, 120.9, 115.8 (d, *J* = 21.8 Hz), 111.1, 101.0, 100.9.

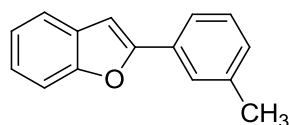

**4h:**<sup>[8]</sup> mp 77–78 °C.

<sup>1</sup>H NMR (400 MHz, CDCl<sub>3</sub>): δ = 7.74–7.70 (m, 2H), 7.61 (d, *J* = 8.0 Hz, 1H), 7.56 (d, *J* = 8.0 Hz, 1H), 7.39–7.24 (m, 3H), 7.21–7.19 (m, 1H), 7.04 (s, 1H), 2.46 (s, 3H); <sup>13</sup>C NMR (100 MHz, CDCl<sub>3</sub>): δ = 156.1, 154.9, 138.4, 130.4, 129.4, 129.3, 128.7, 125.5, 124.2, 122.9, 122.1, 120.8, 111.1, 101.2, 21.5.

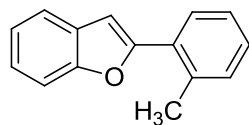

**4i:**<sup>[7]</sup> mp 98–99 °C.

<sup>1</sup>H NMR (400 MHz, CDCl<sub>3</sub>): δ = 7.86–7.84 (m, 1H), 7.61 (d, *J* = 8.0 Hz, 1H), 7.53 (d, *J* = 8.0 Hz, 1H), 7.32–7.28 (m, 4H), 7.26–7.24 (m, 1H), 6.90 (s, 1H), 2.59 (s, 3H); <sup>13</sup>C NMR (100 MHz, CDCl<sub>3</sub>): δ = 155.7, 154.4, 135.9, 131.2, 130.0, 129.2, 128.5, 128.2, 126.1, 124.2, 122.8, 120.9, 111.1, 105.1, 21.9.



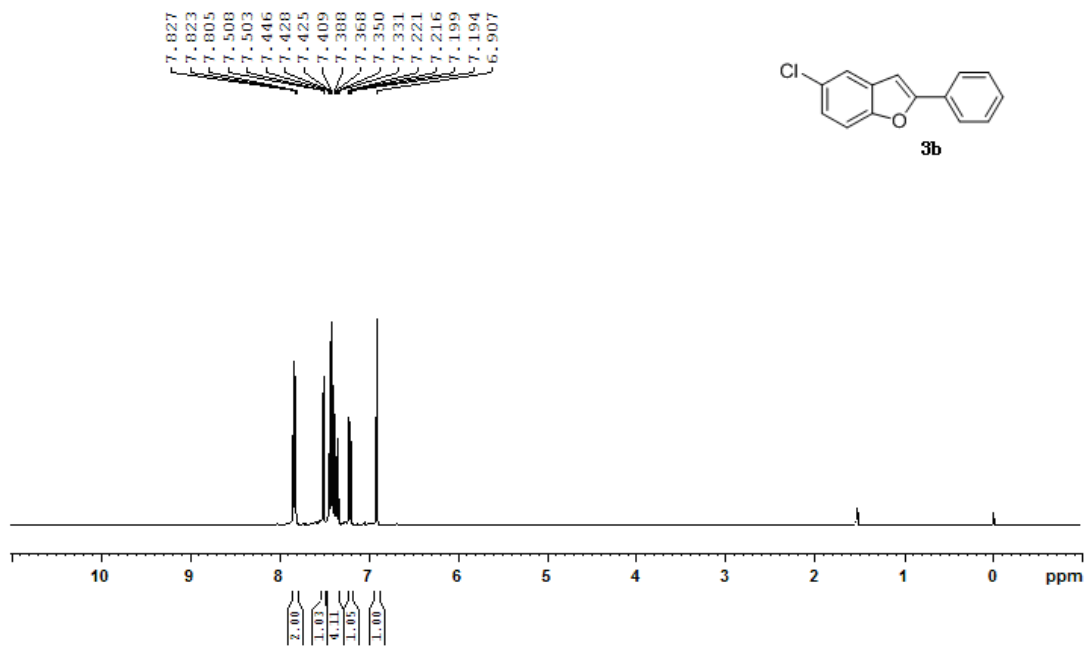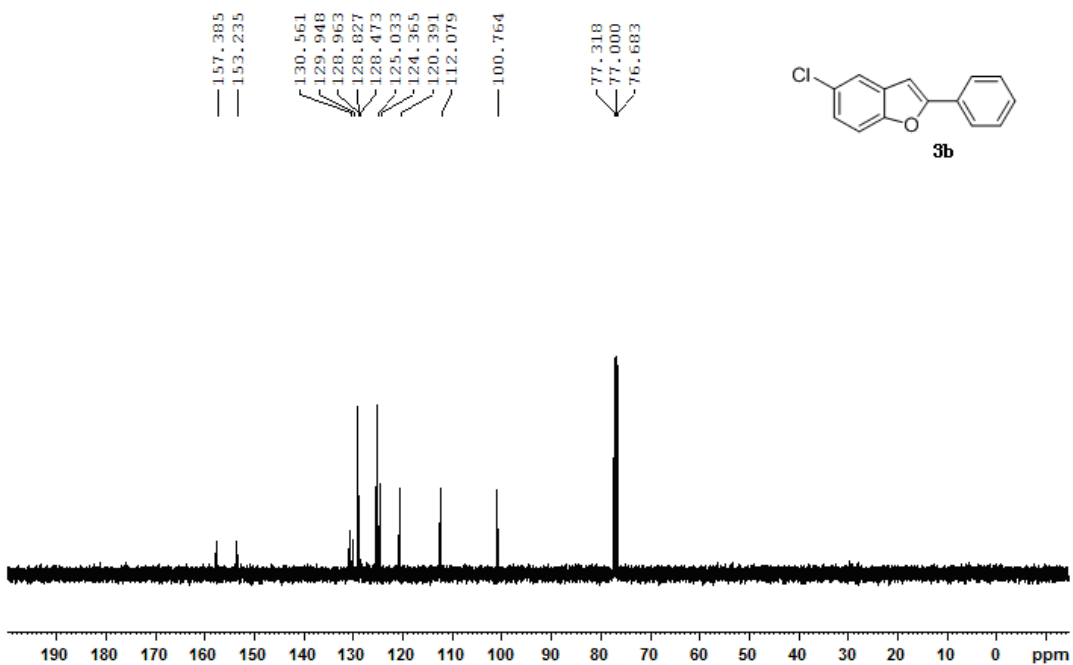

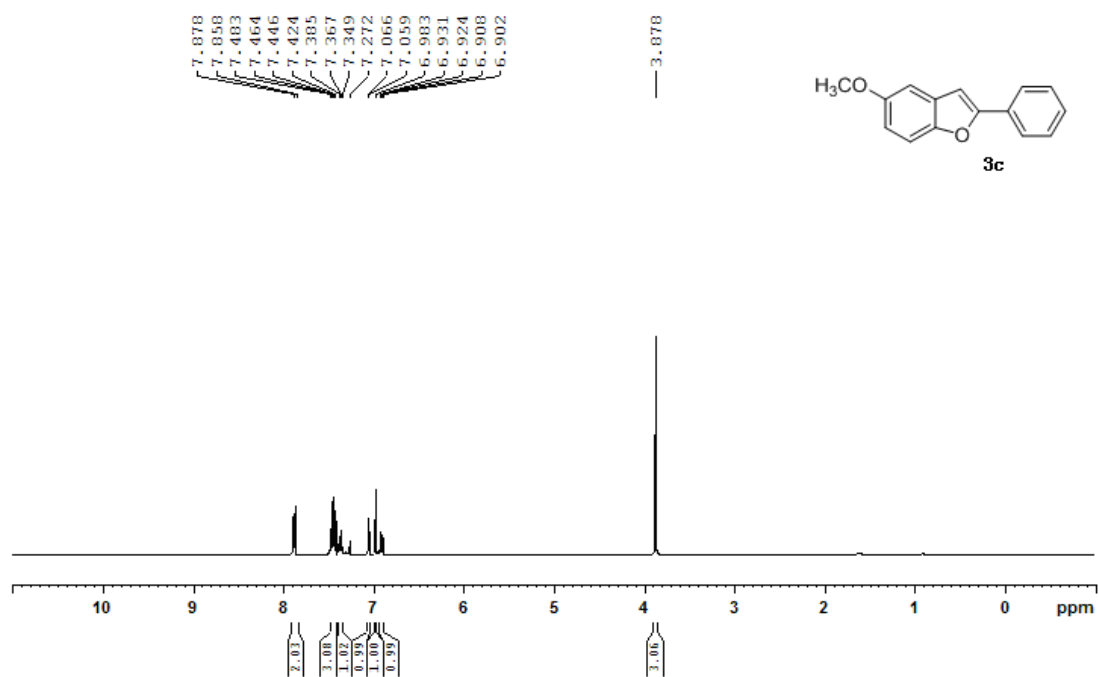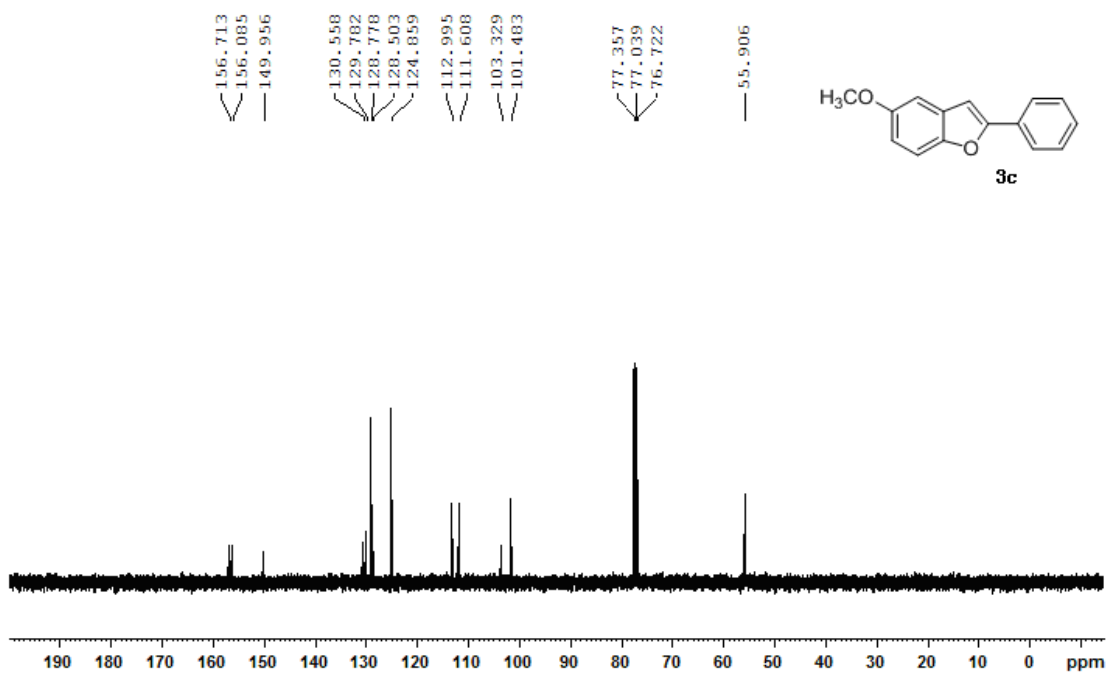

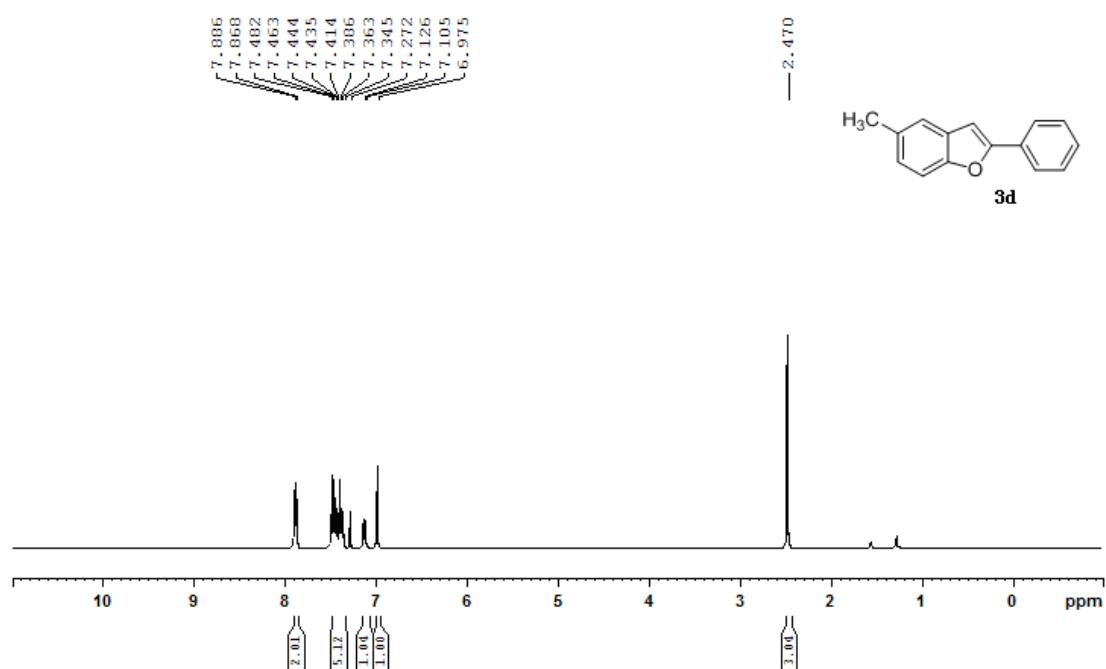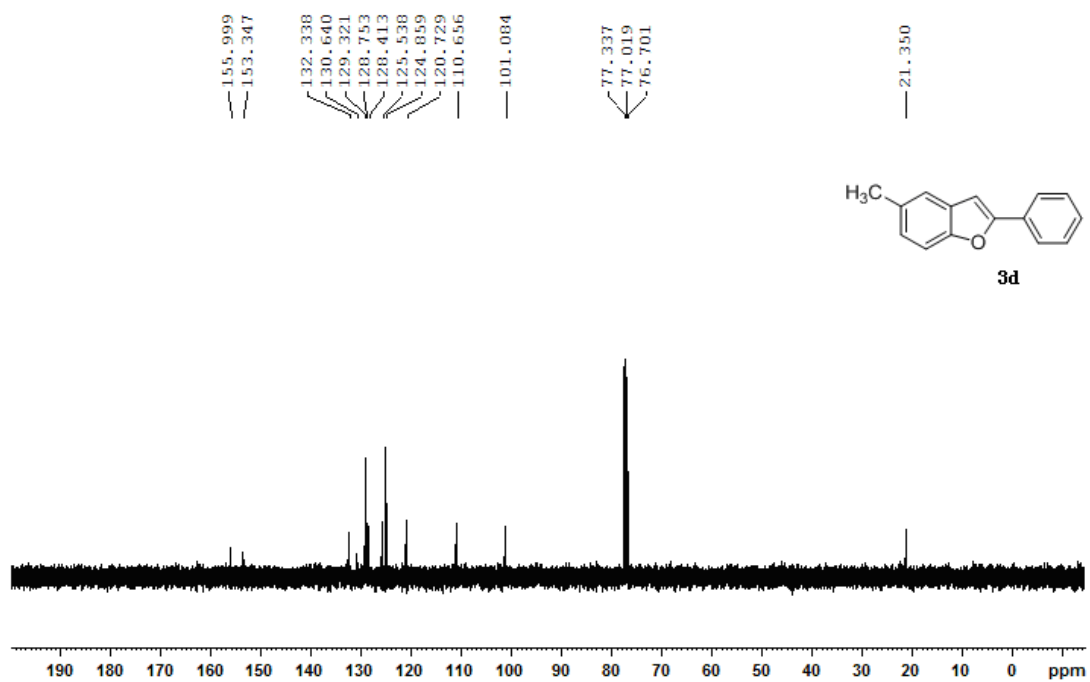

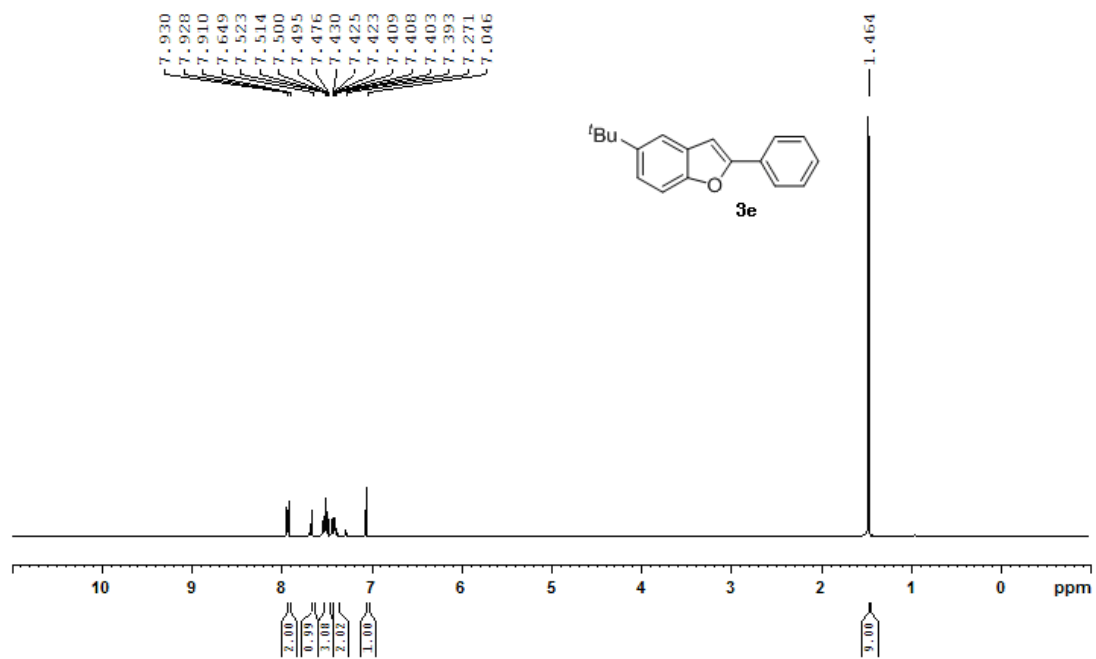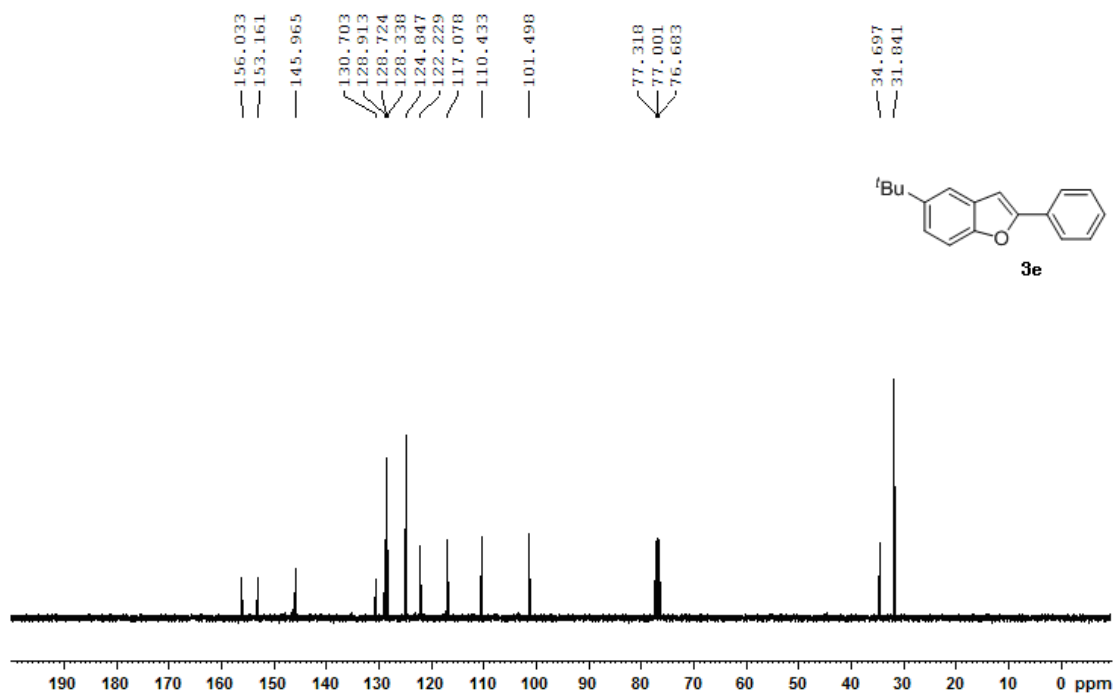

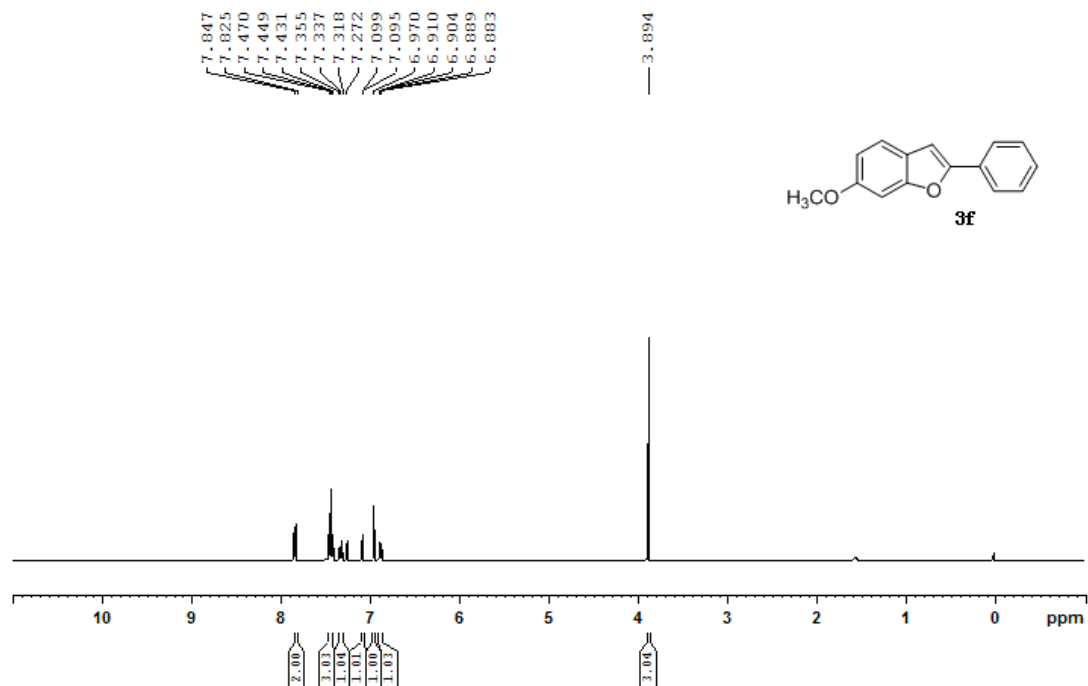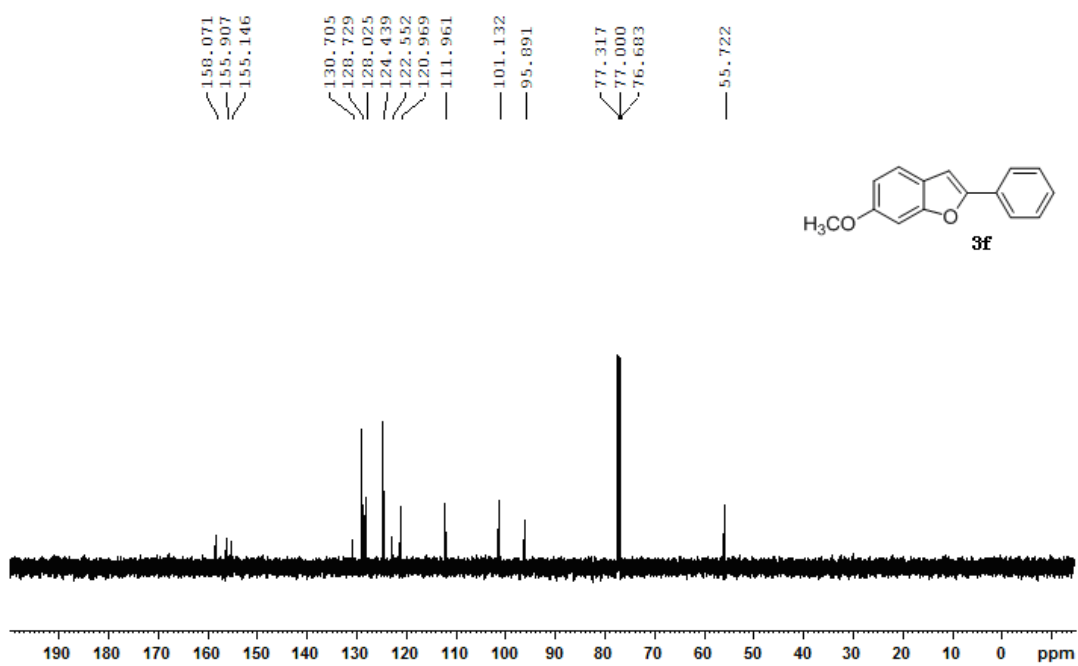



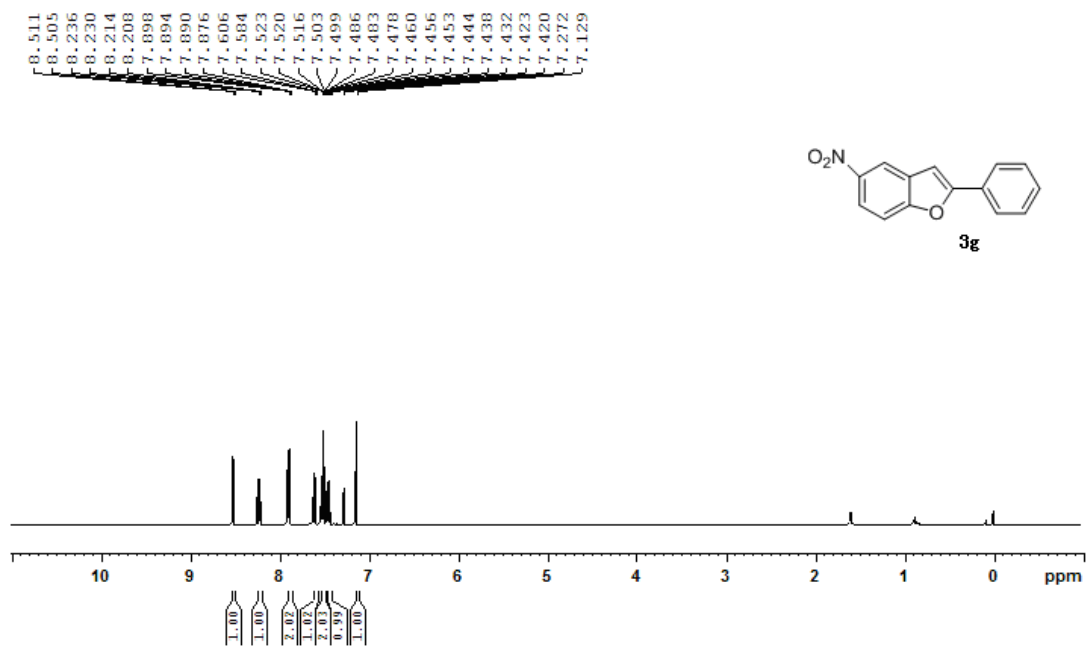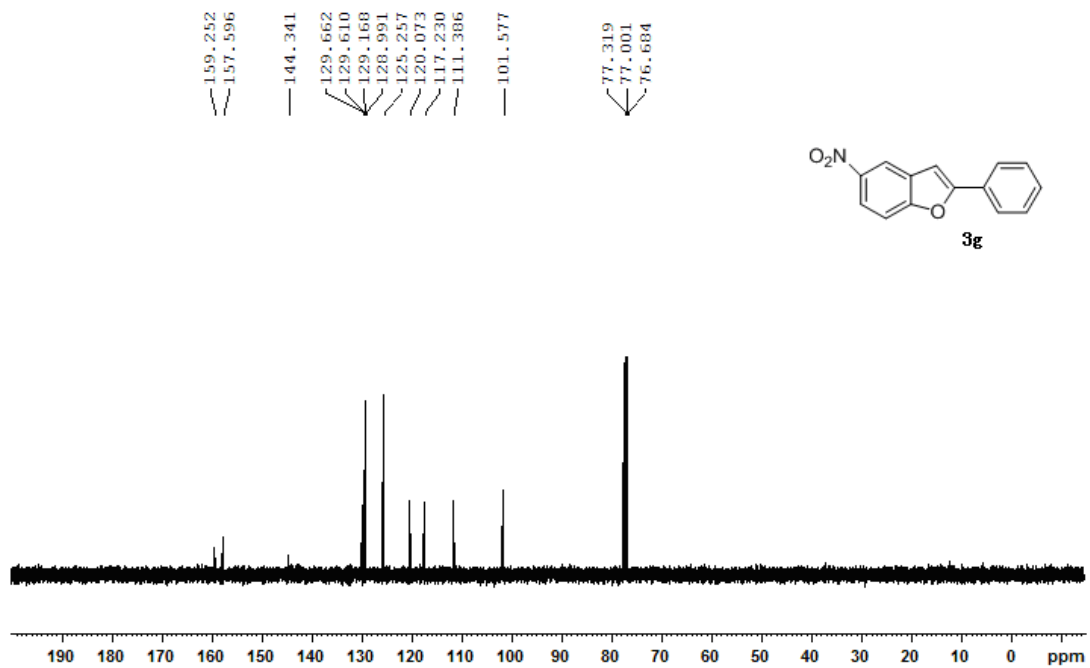

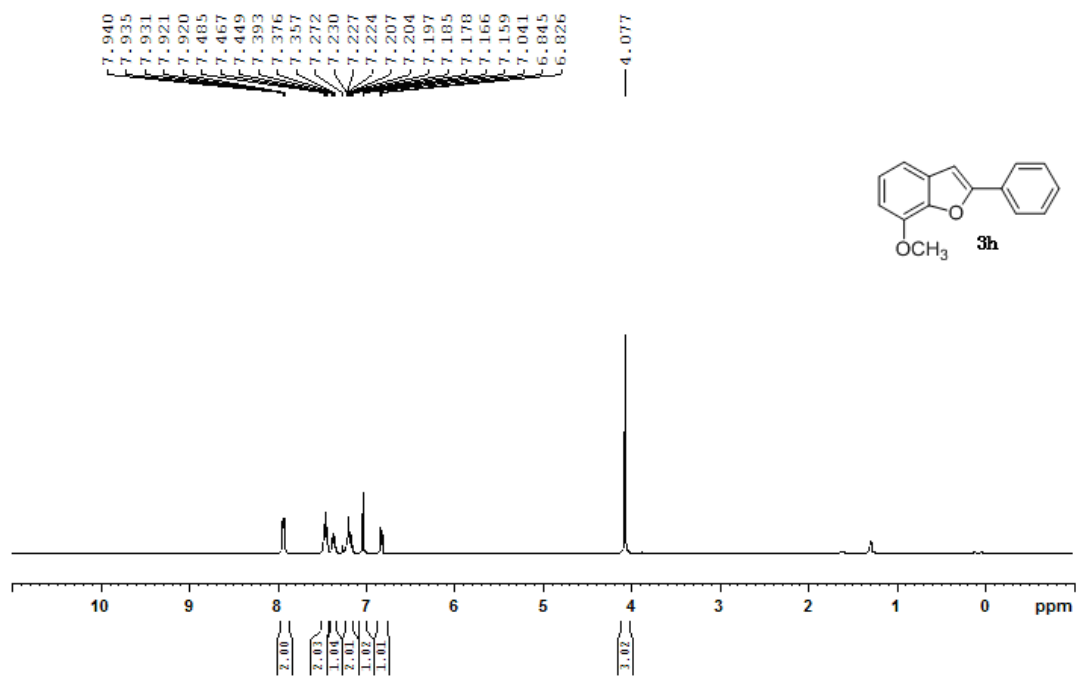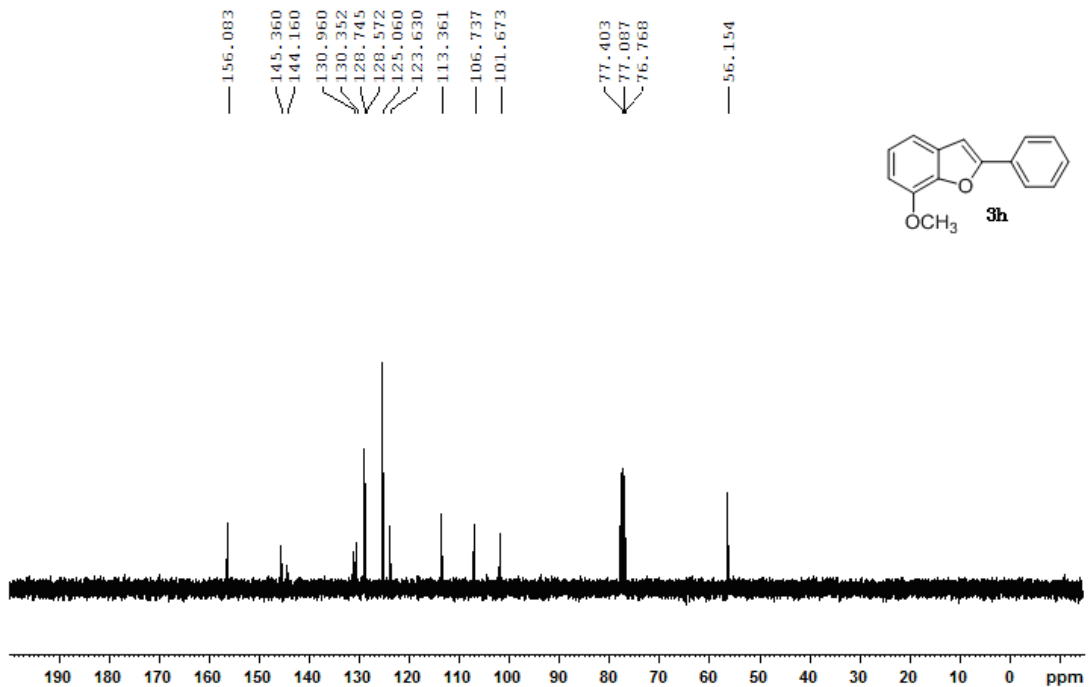

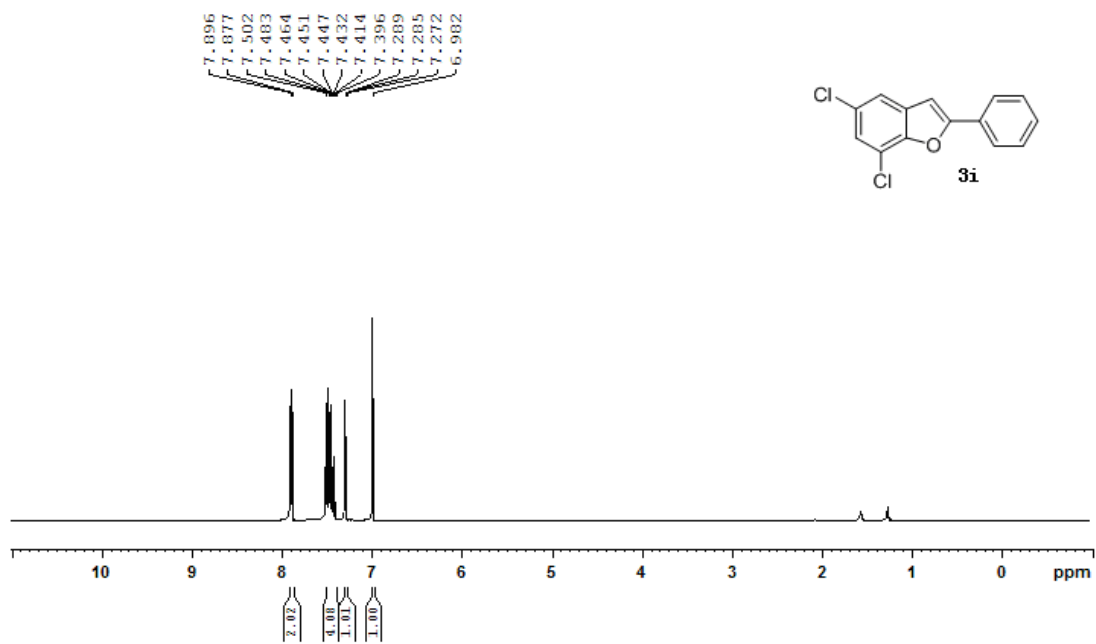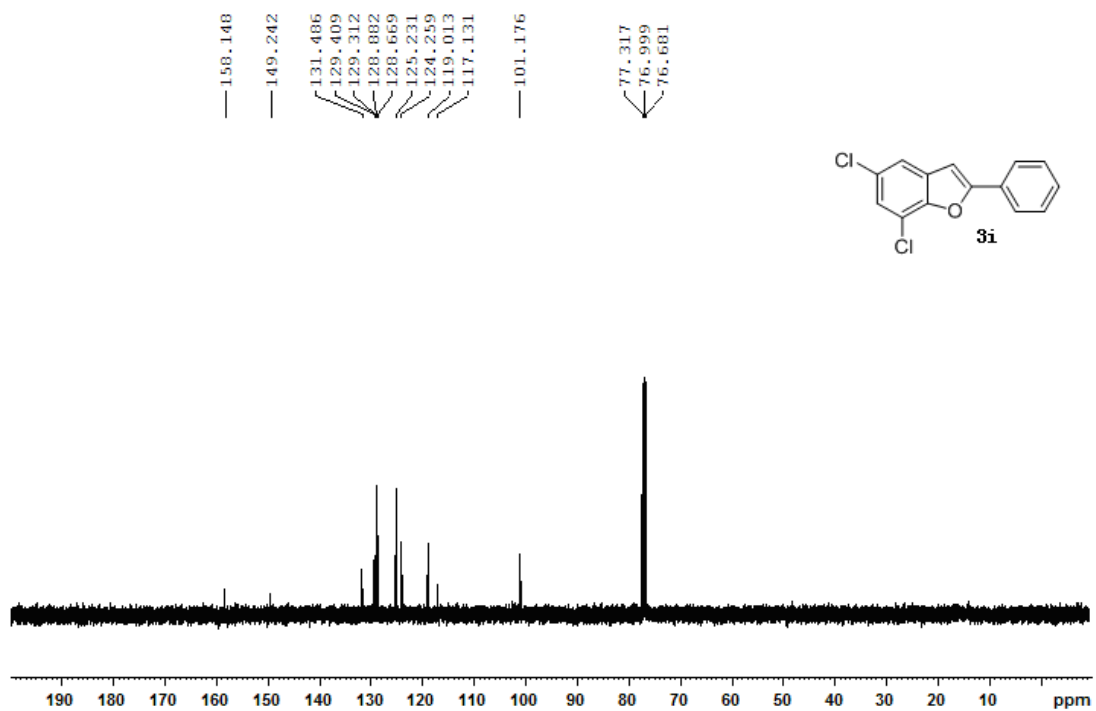

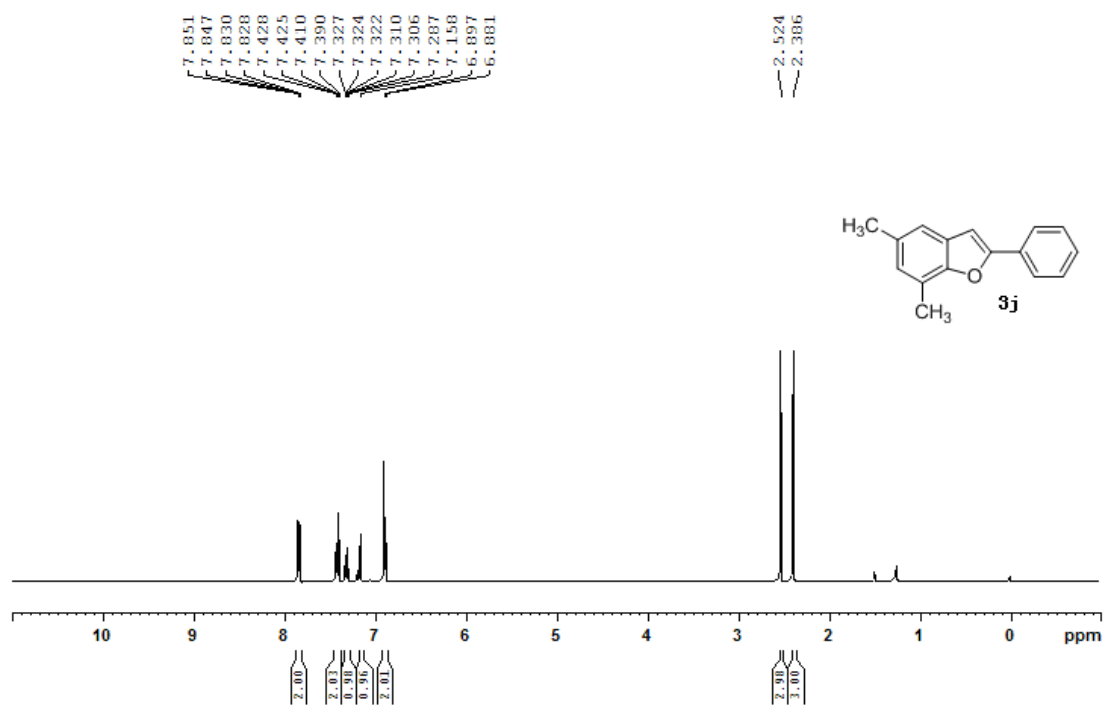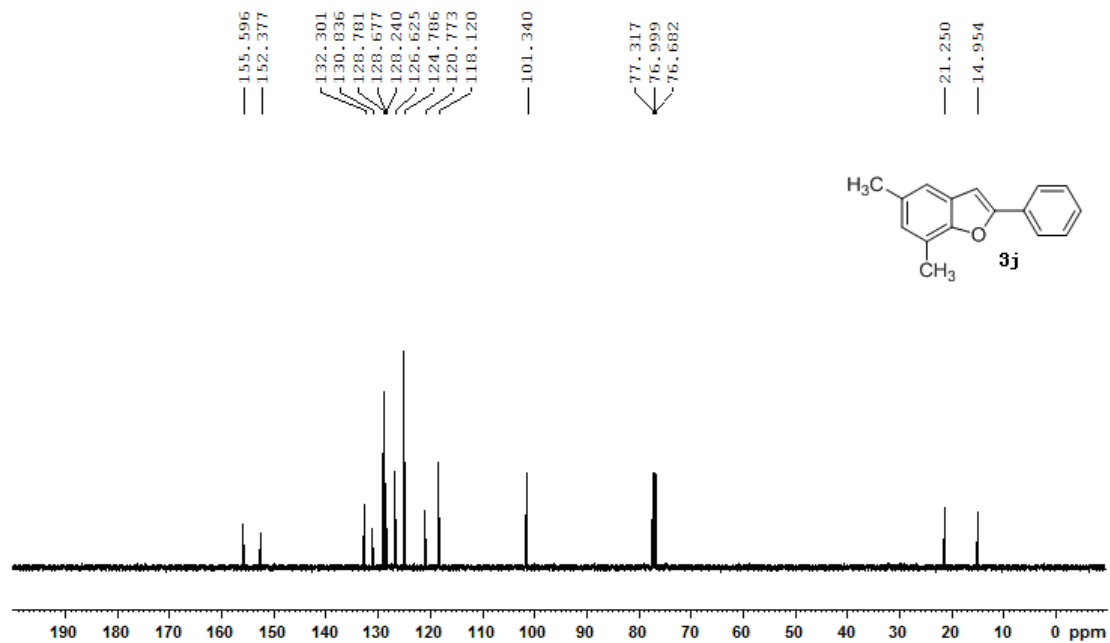



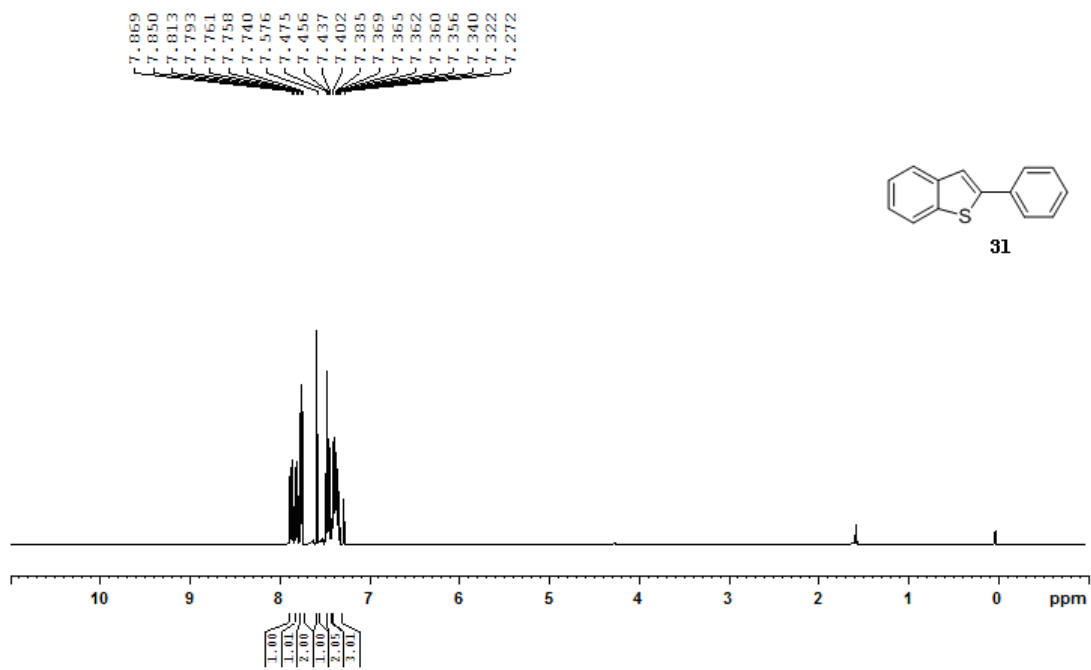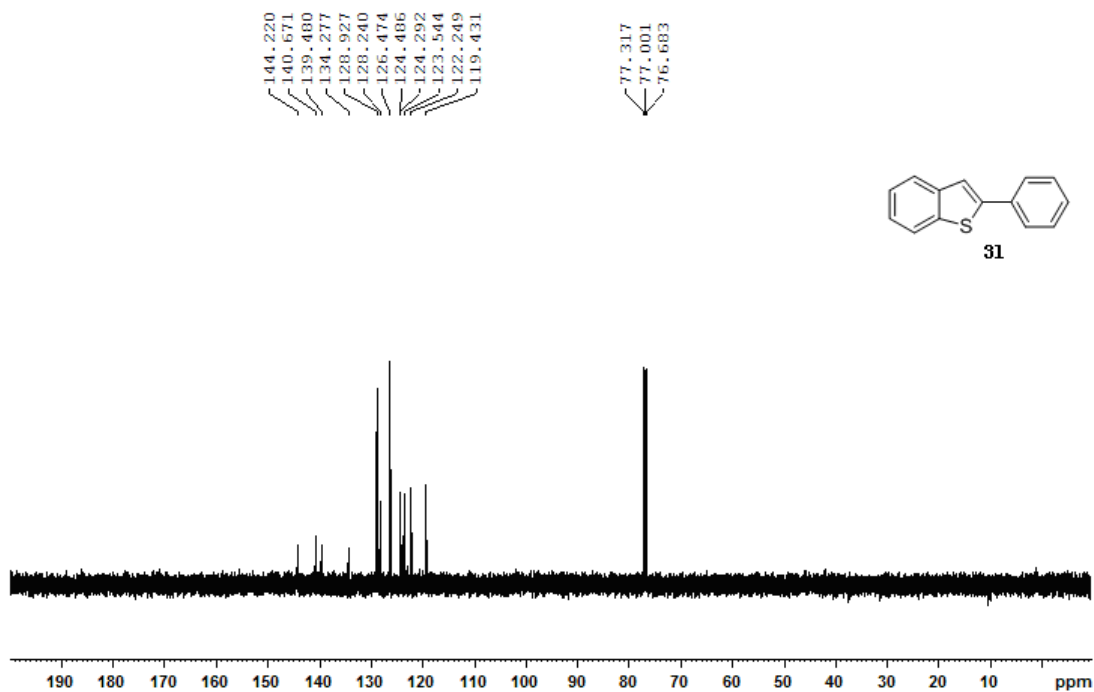

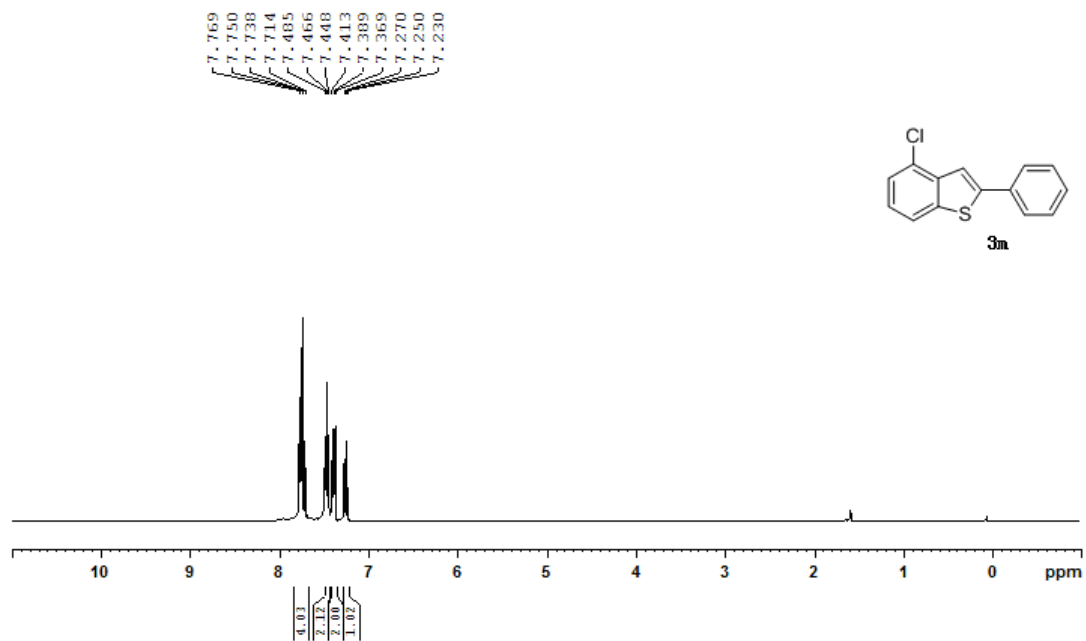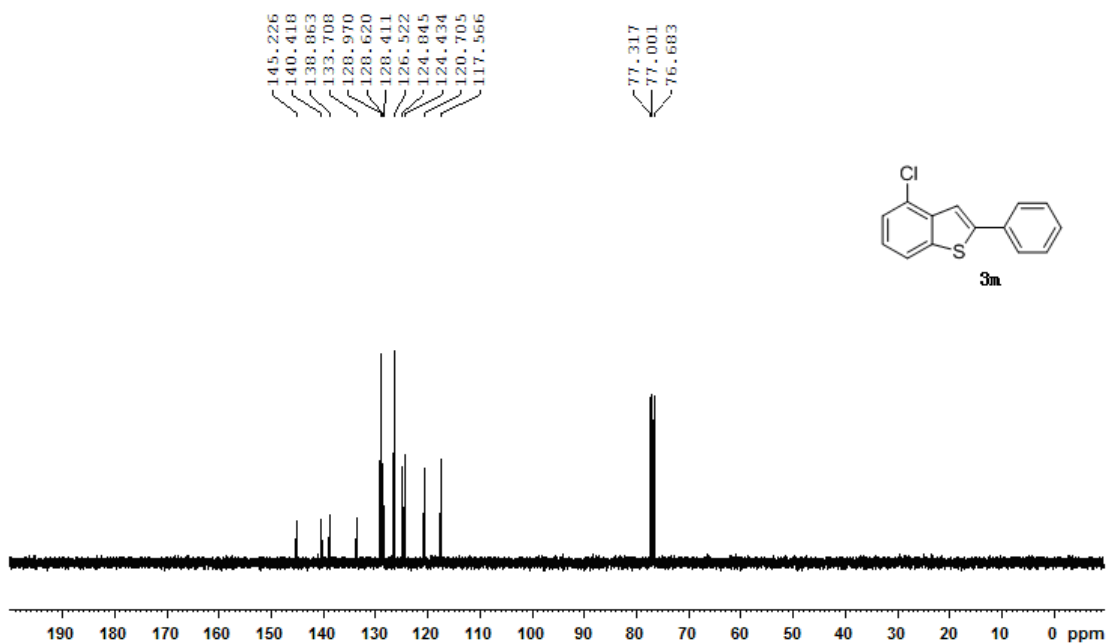

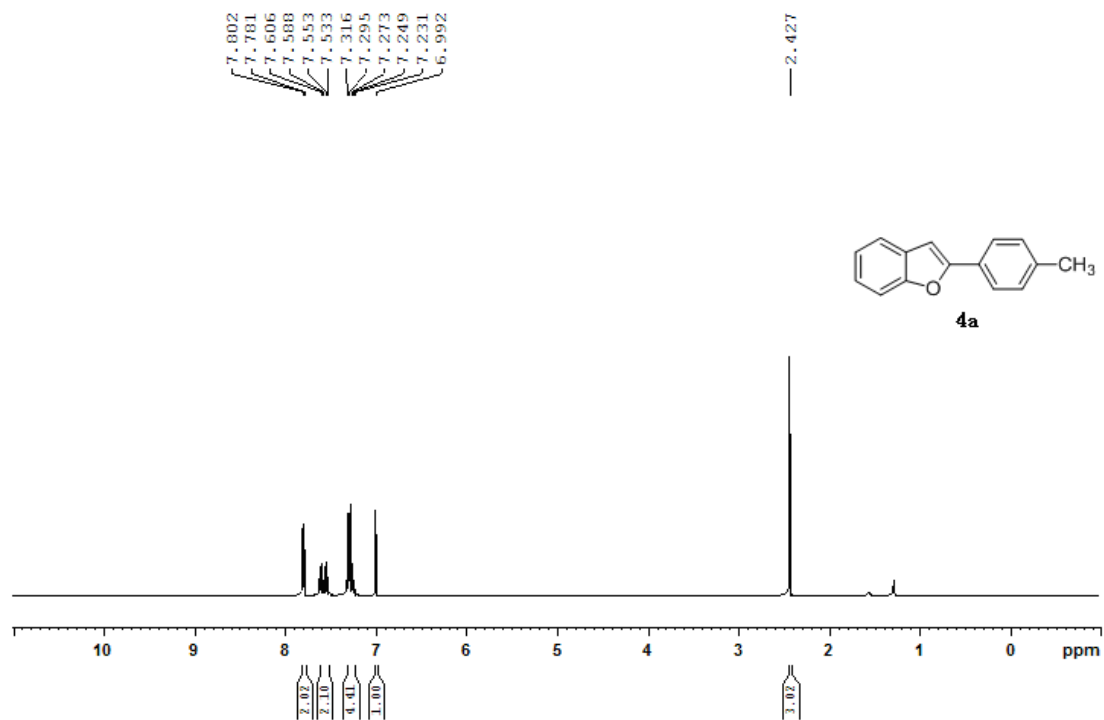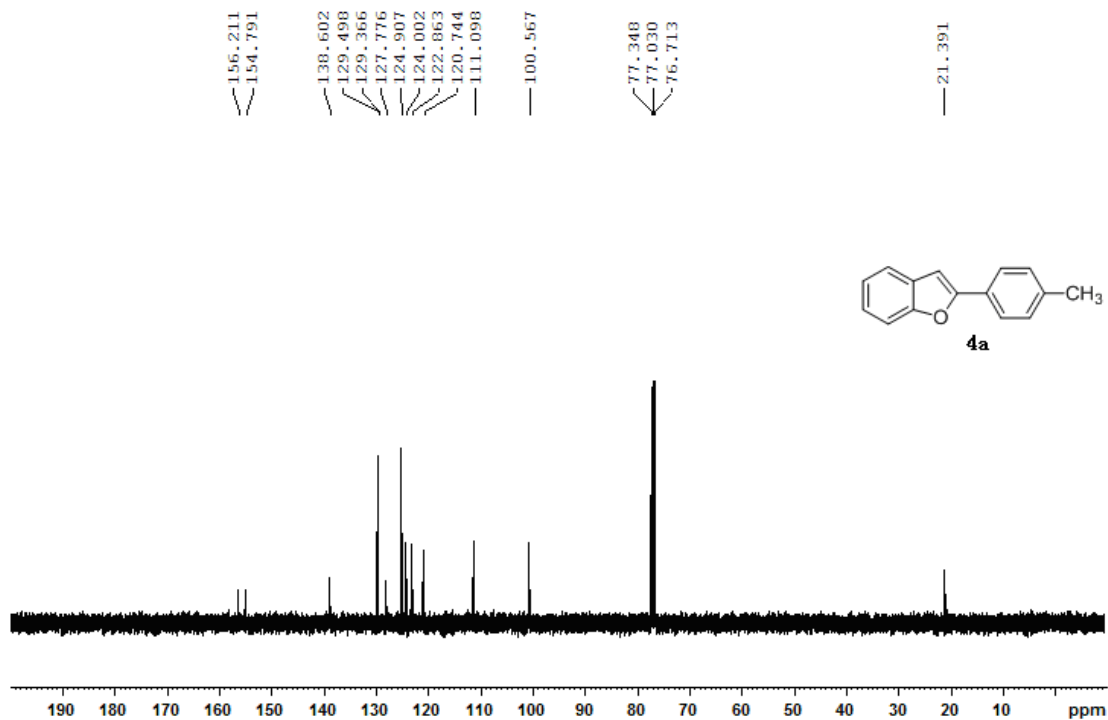



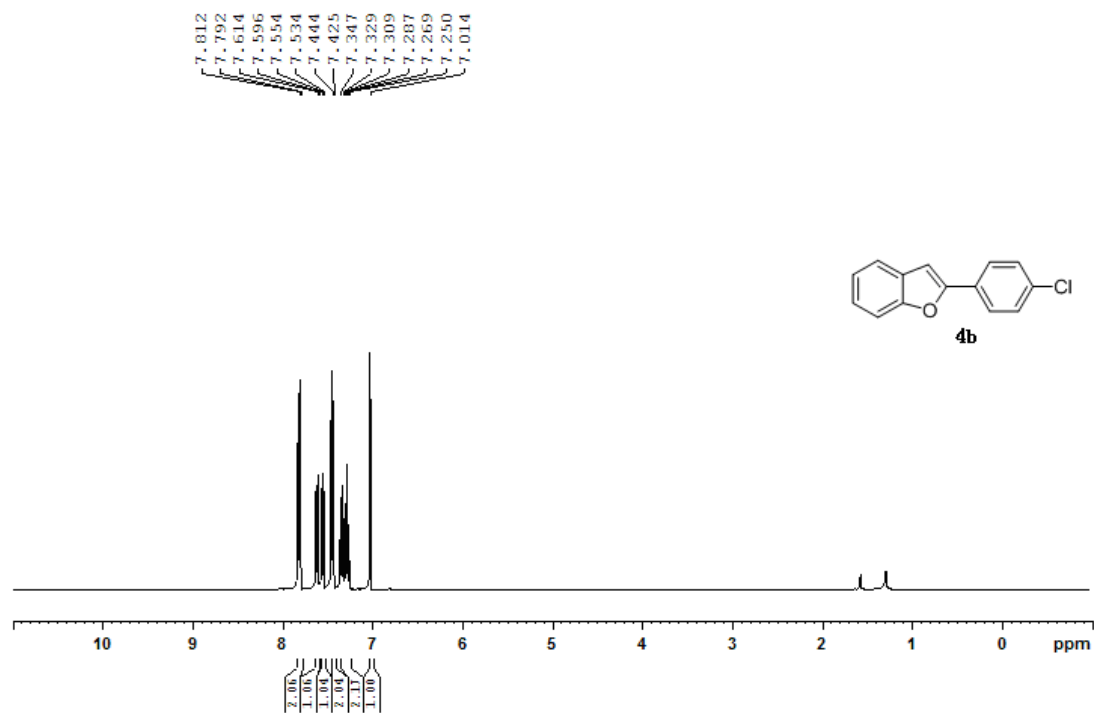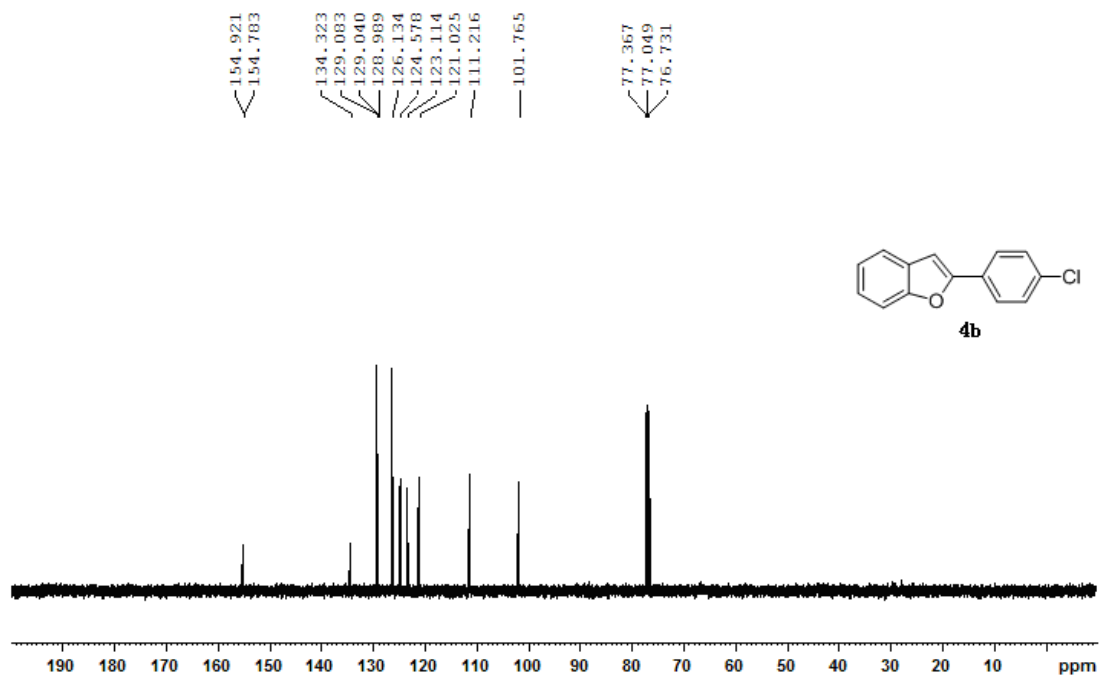

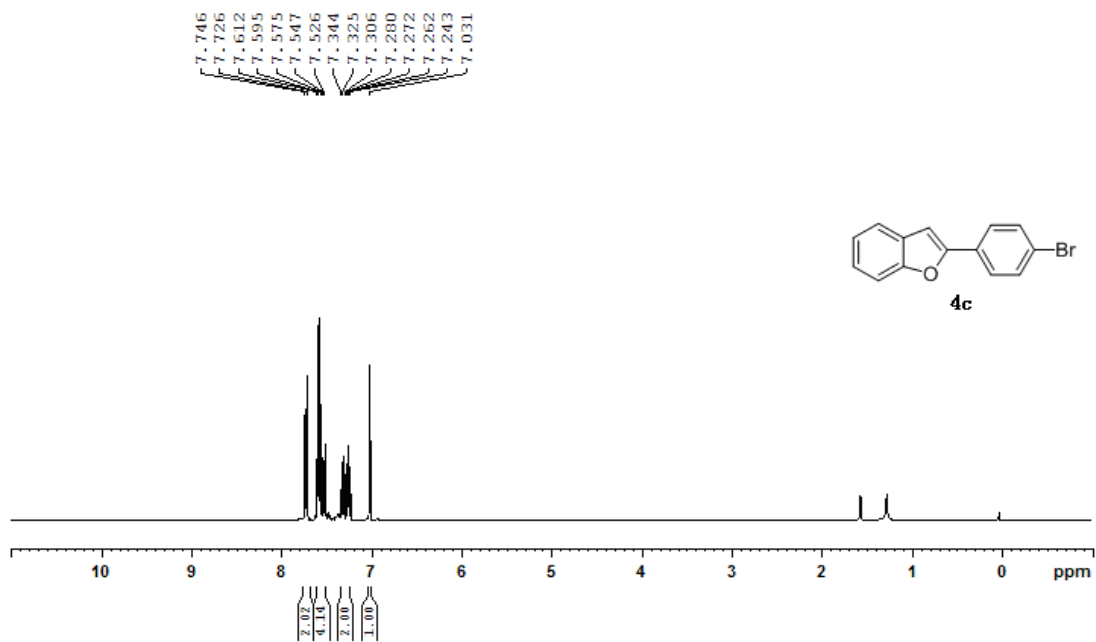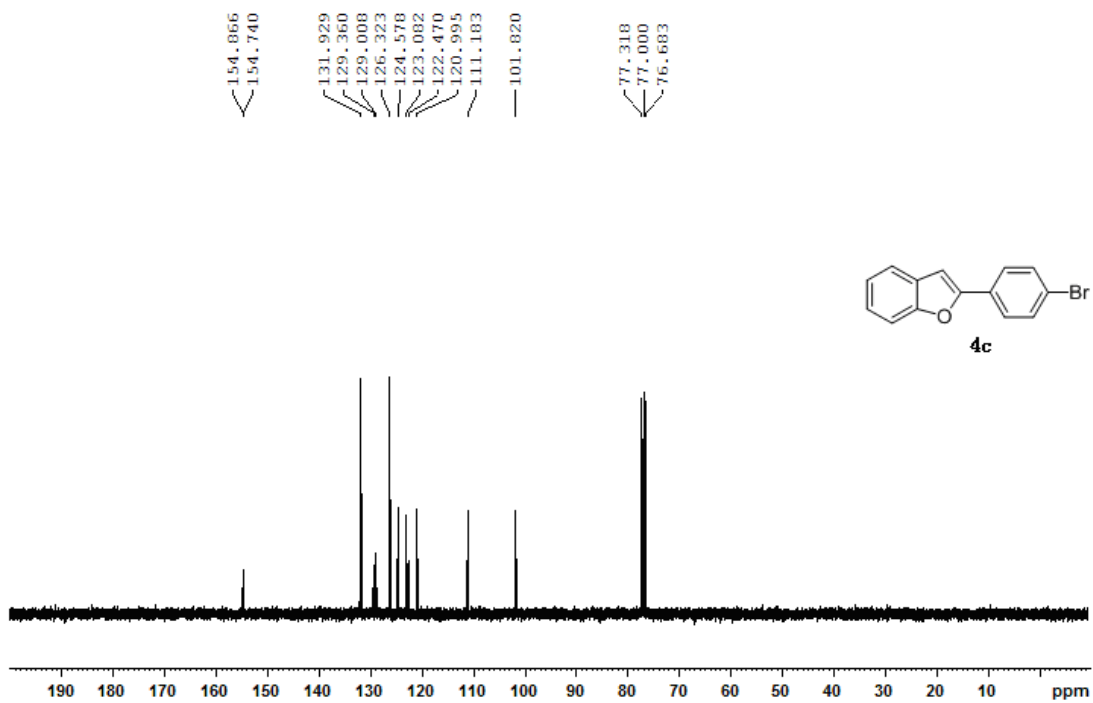

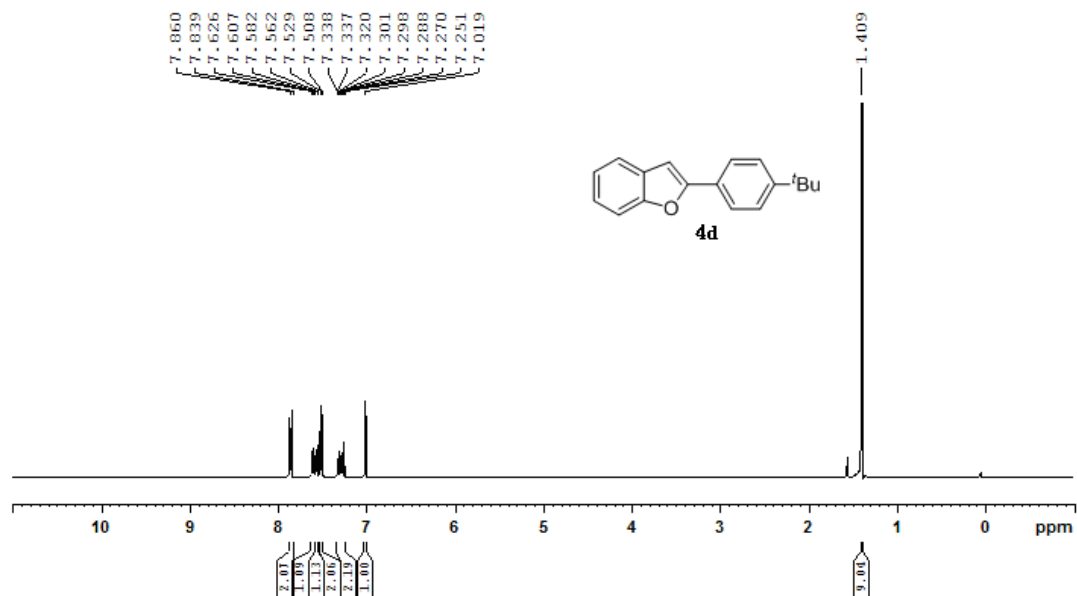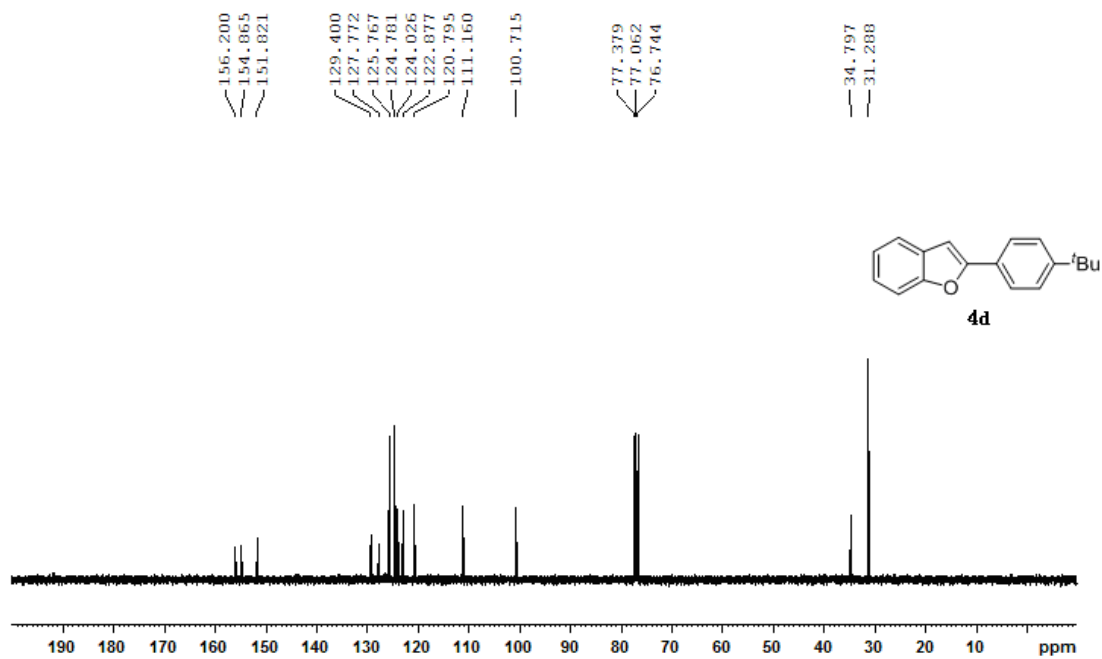

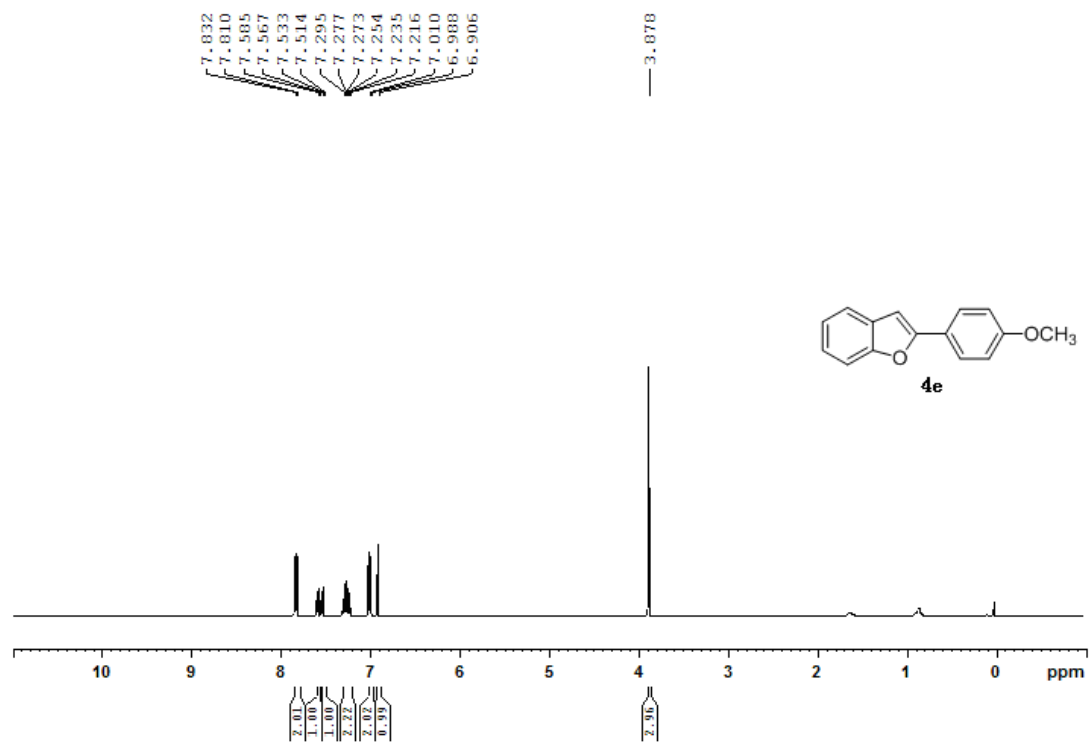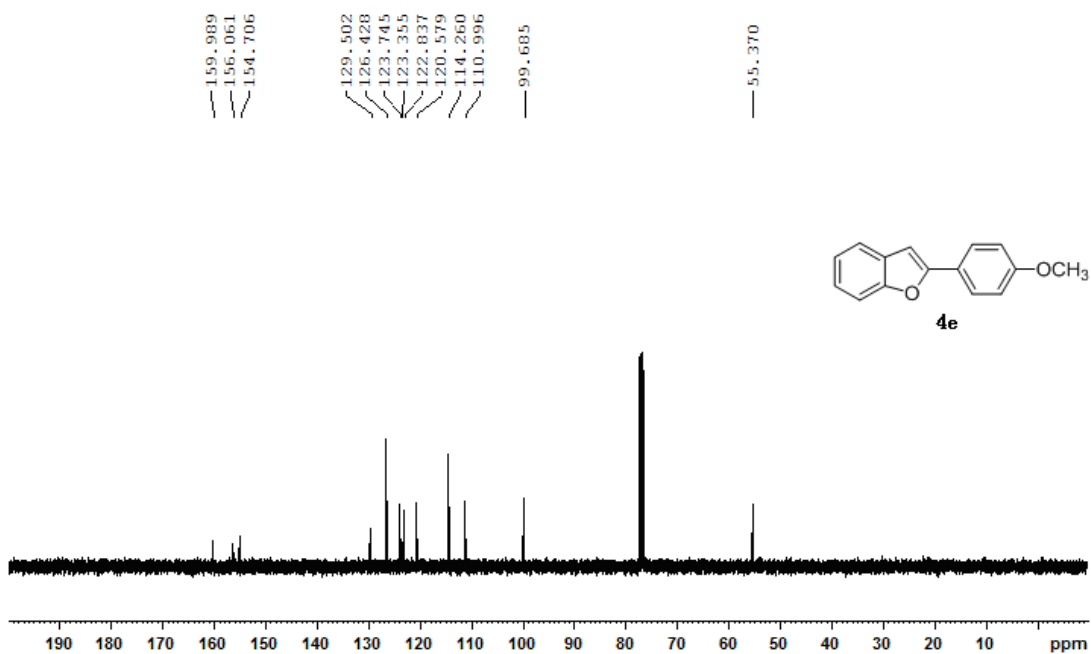

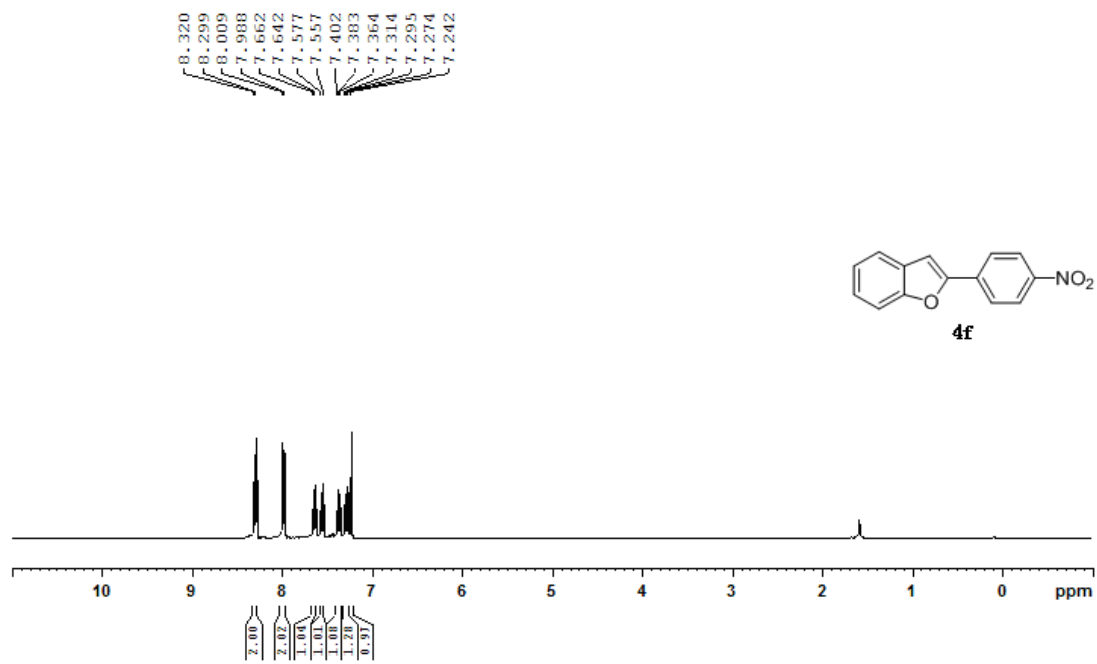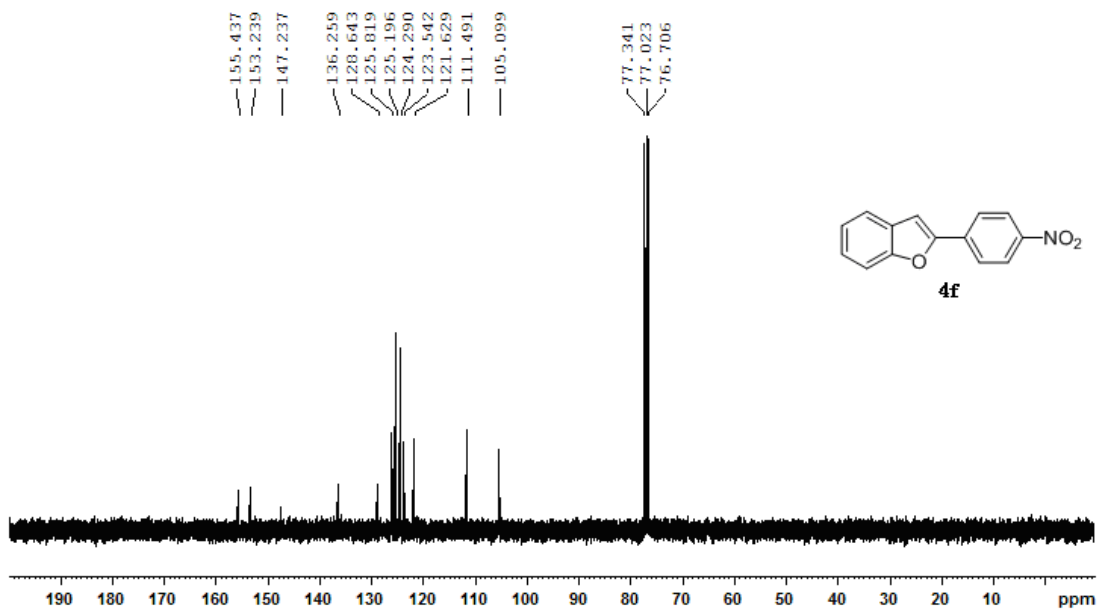

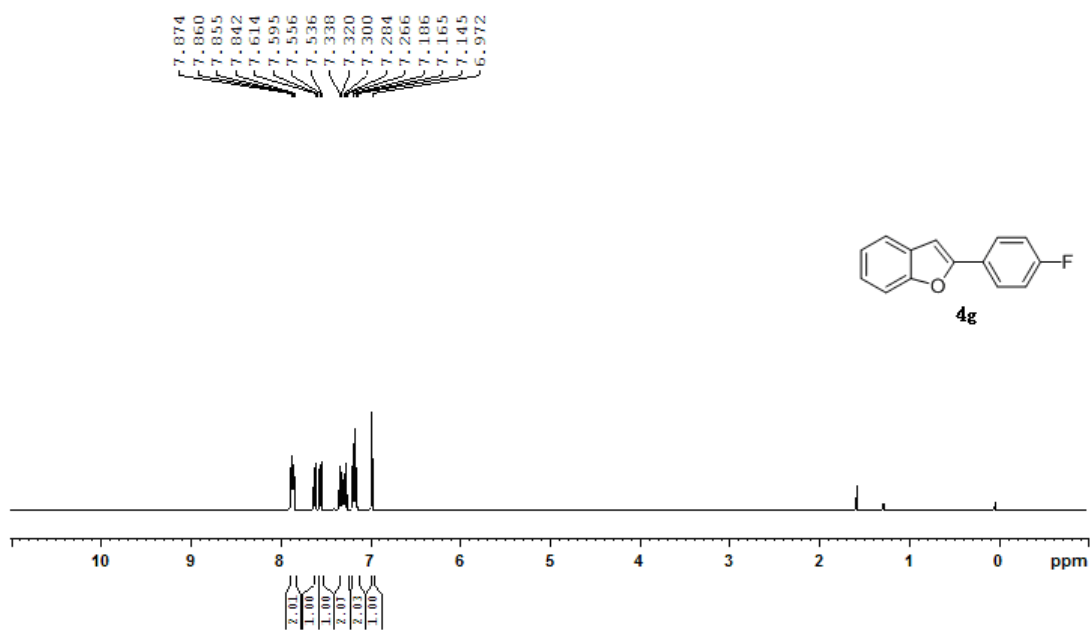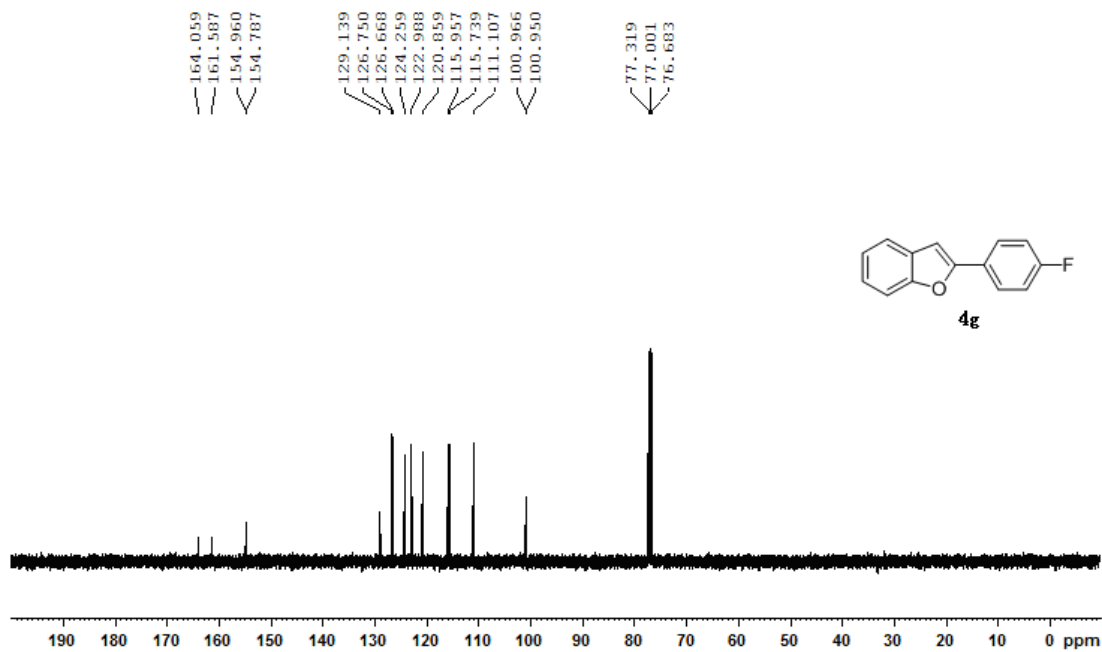

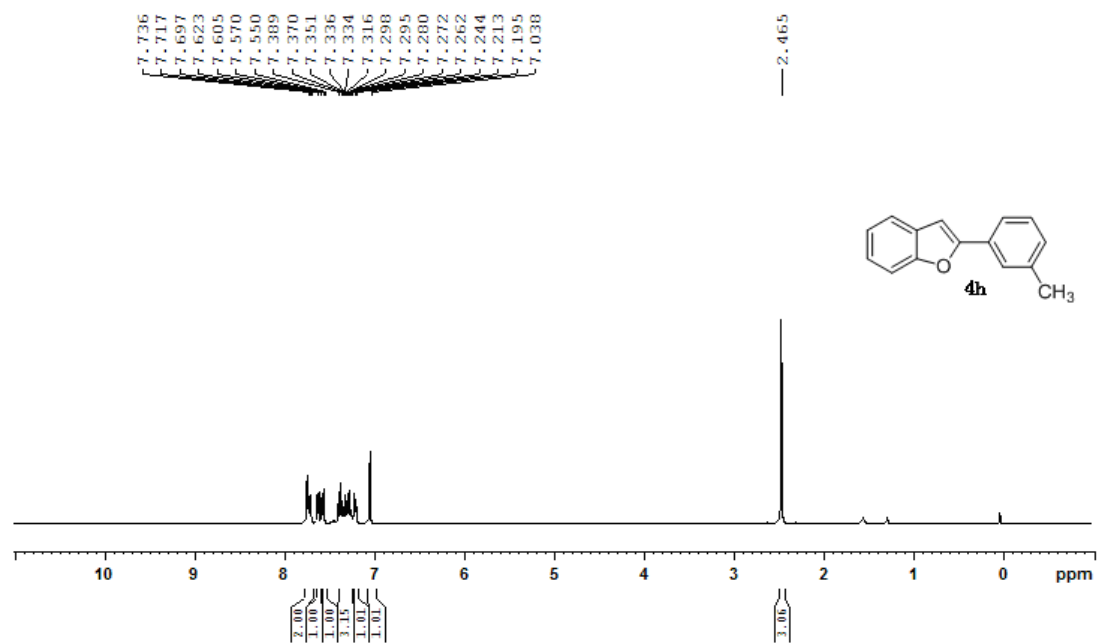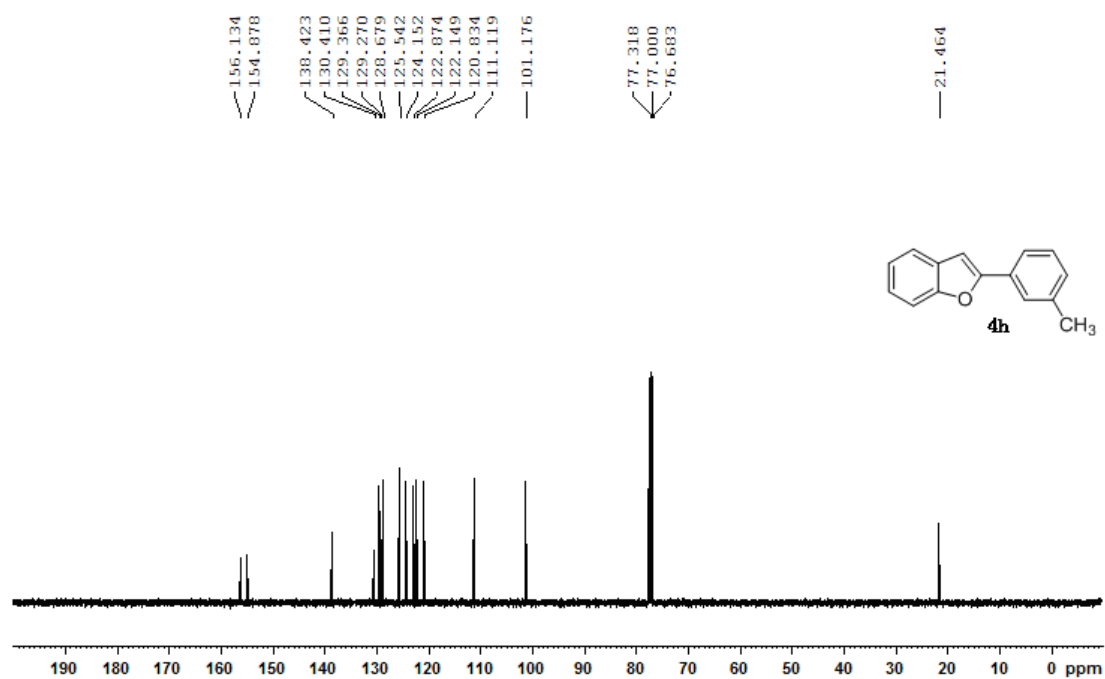

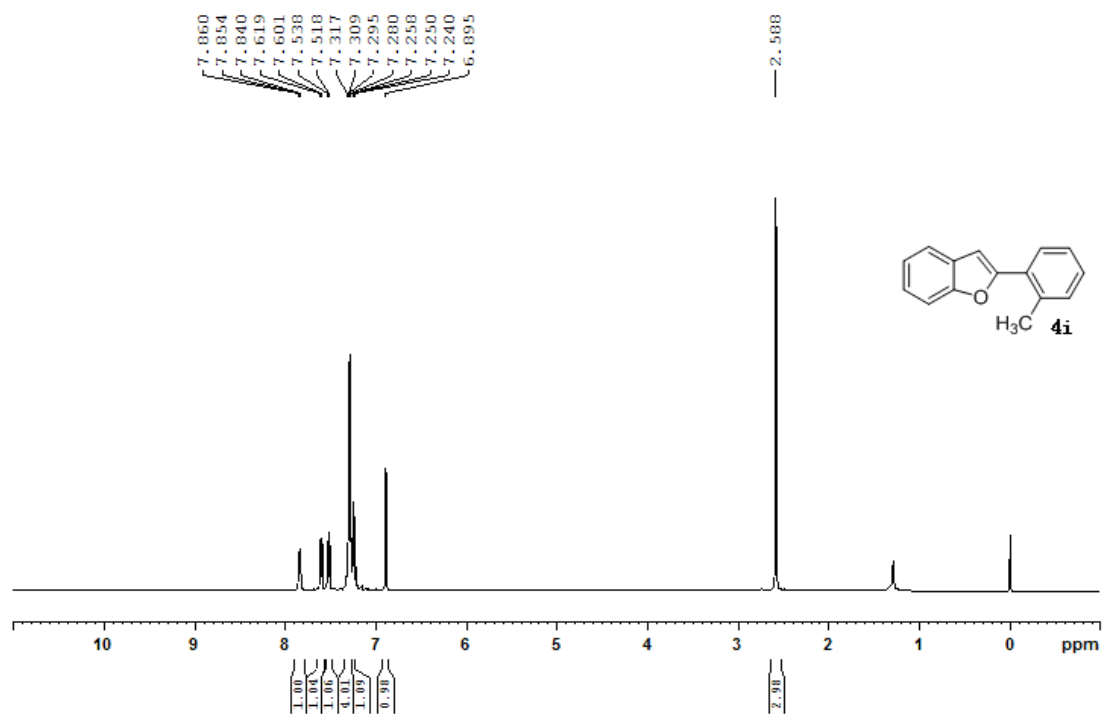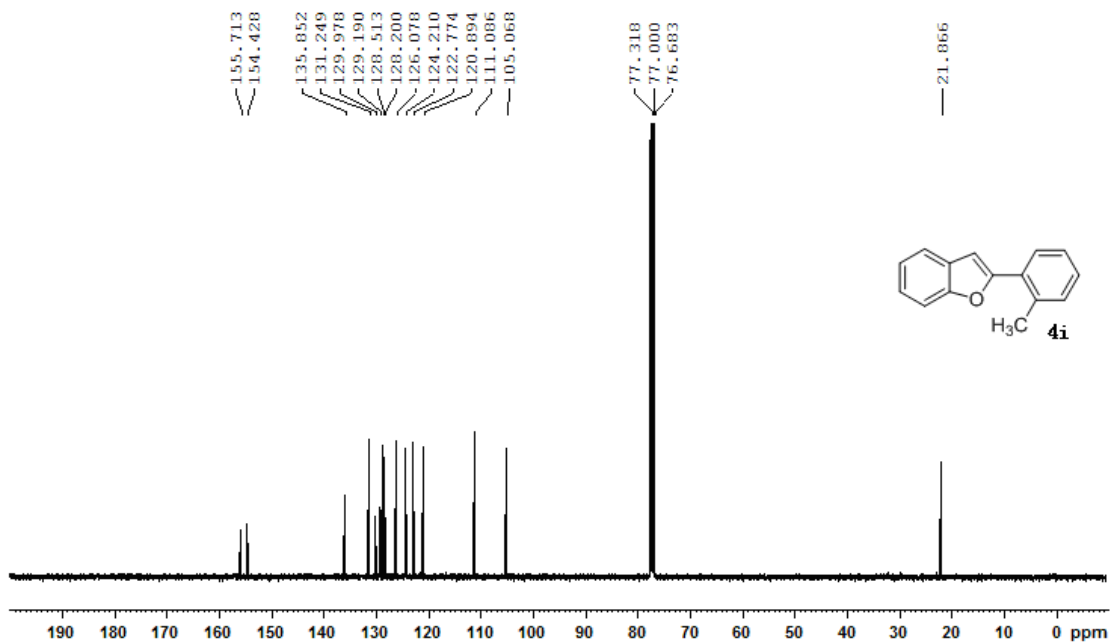



## 5. References

- [1] J. Liu, W. Chen, Y. Ji and L. Wang, *Adv. Synth. Catal.*, 2012, **354**, 1585–1592.
- [2] S.-H. Wang, P.-H. Li, L. Yu and L. Wang, *Org. Lett.*, 2011, **13**, 5968–5971.
- [3] L. M. Geary and P. G. Hultin, *Org. Lett.*, 2009, **11**, 5478–5481.
- [4] G. Y. Wu, W. Y. Yin, H. C. Shen and Y. Huang, *Green Chem.*, 2012, **14**, 580–585.
- [5] G. W. Kabalka, L. Wang and R. M. Pagni, *Tetrahedron*, 2001, **57**, 8017–8028.
- [6] J. Bonnamour, M. Piedrafita and C. Bolm, *Adv. Synth. Catal.*, 2010, **352**, 1577–1581.
- [7] S. E. Denmark, R. C. Smith, W-T. T. Chang and J. M. Muhuhi, *J. Am. Chem. Soc.*, 2009, **131**, 3104–3118.
- [8] M. Carril, A. Correa and C. Bolm, *Angew. Chem. Int. Ed.*, 2008, **47**, 4862–4865.
